# Supplementary material for: Room temperature Z-selective hydrogenation of alkynes by hemilabile and non-innocent (NNN)Co(ii) catalysts
Source: Royal Society of Chemistry journal article supplement (doi:10.1039/d2cy00027j), 2022-01-01

## Supporting Information

# Room temperature *Z*-selective hydrogenation of alkynes by hemilabile and non-innocent (*NNN*)Co(II) catalyst

Dipesh M. Sharma,<sup>a,b</sup> Chandrakant Gouda,<sup>a</sup> Rajesh G. Gonnade,<sup>b,c</sup> and Benudhar Punji<sup>\*,a,b</sup>

<sup>a</sup> Organometallic Synthesis and Catalysis Lab, Organic Chemistry Division, CSIR–National Chemical Laboratory (CSIR–NCL), Dr. Homi Bhabha Road, Pune 411 008, India

Phone: + 91-20-2590 2733, Fax: + 91-20-2590 2621. E-mail: [b.punji@ncl.res.in](mailto:b.punji@ncl.res.in)

<sup>b</sup> Academy of Scientific and Innovative Research (AcSIR), Ghaziabad- 201 002, India

<sup>c</sup> Centre for Material Characterization, CSIR–National Chemical Laboratory (CSIR–NCL), Dr. Homi Bhabha Road, Pune, India

## Contents

|                                                | Page # |
|------------------------------------------------|--------|
| 1. General Experimental                        | S3     |
| 2. Procedure for Synthesis of Cobalt Complexes | S3     |
| 3. Representative Procedure for Hydrogenation  | S6     |
| 4. Detailed Optimization Table                 | S7     |
| 5. Characterization Data of Z-Alkenes          | S8     |
| 6. Unsuccessful Substrates                     | S17    |
| 7. Mechanistic Experiments                     | S18    |
| 8. Crystallographic Data                       | S22    |
| 9. References                                  | S24    |
| 10. NMR Spectra of Z-Alkenes                   | S25    |

## 1. General Experimental

All manipulations were conducted under an argon atmosphere either in a glove box or by using standard Schlenk techniques in pre-dried glassware. The catalytic reactions were performed in oven-dried reaction vessels with Teflon screw caps. Methanol was dried and distilled from Mg-cake. All other liquid reagents were flushed with argon prior to use. The ligands *N,N*-diethyl-*N*2-(quinolin-8-yl)ethane-1,2-diamine (**1**),<sup>1</sup> 2-(diethylamino)-*N*-(quinolin-8-yl)acetamide (**3**),<sup>2</sup> *N*-methyl-8-aminoquinoline,<sup>3</sup> *N*-acetyl-8-aminoquinoline<sup>4</sup> were prepared according to the literature described procedures. All other chemicals were obtained from commercial sources and were used without further purification. Yields refer to the isolated compounds, estimated to be > 95% pure as determined by <sup>1</sup>H-NMR. High resolution mass spectrometry (HRMS) mass spectra were recorded with a Thermo Scientific Q-Exactive, Accela 1250 pump. <sup>1</sup>H and <sup>13</sup>C NMR spectra were recorded at 400 or 500 MHz (<sup>1</sup>H), 100 or 125 MHz, (<sup>13</sup>C, DEPT) and 377 MHz (<sup>19</sup>F) with Bruker AV 400 and AV 500 spectrometers in CDCl<sub>3</sub> solutions unless otherwise specified. The <sup>1</sup>H and <sup>13</sup>C NMR spectra were referenced to residual solvent signals (CDCl<sub>3</sub>: δ<sub>H</sub> = 7.26 ppm, δ<sub>C</sub> = 77.2 ppm). Virtual triplets are denoted as “vt”.

**GC Method.** Gas Chromatography analyses were performed using a Shimadzu GC-2010 gas chromatograph equipped with a Shimadzu AOC-20s auto sampler and a Restek RTX-5 capillary column (30 m x 250 μm). The instrument was set to an injection volume of 1 μL, an inlet split ratio of 10:1, and inlet and detector temperatures of 250 and 320 °C, respectively. UHP-grade argon was used as carrier gas with a flow rate of 30 mL/min. The temperature program used for all the analyses is as follows: 80 °C, 1 min; 30 °C/min to 200 °C, 2 min; 30 °C/min to 260 °C, 3 min; 30 °C/min to 300 °C, 3 min.

## 2. Procedure for Synthesis of Cobalt Complexes

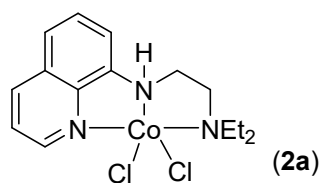

A solution of ligand **1** (0.243 g, 1.0 mmol) in THF (10 mL) was added dropwise to the anhydrous CoCl<sub>2</sub> (0.130 g, 1.0 mmol) in THF (10 mL) and the reaction mixture was stirred at room temperature for 12 h. The light pink coloured precipitate obtained was filtered and washed with Et<sub>2</sub>O (5 mL x 3). Upon drying under vacuum, the light pink complex **2a** was

obtained. Yield: 0.339 g, 91%. The crystal suitable for a single-crystal X-ray diffraction was obtained from saturated solution of complex **2a** in acetonitrile at -15 °C. Elemental Analysis Calcd (%) for C, 48.28; H, 5.67; N, 11.26; Found: C, 48.36; H, 5.34; N, 10.95.

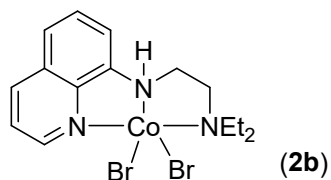

A solution of ligand **1** (0.243 g, 1.0 mmol) in THF (10 mL) was added dropwise to the anhydrous CoBr<sub>2</sub> (0.219 g, 1.0 mmol) in THF (10 mL) and the reaction mixture was stirred at room temperature for 12 h. The light pink coloured precipitate obtained was filtered and washed with Et<sub>2</sub>O (5 mL x 3). Upon drying under vacuum, the light pink complex **2b** was obtained. Yield: 0.430 g, 93%. Elemental Analysis Calcd (%) for C, 38.99; H, 4.58; N, 9.09; Found: C, 38.56; H, 4.78; N, 9.47.

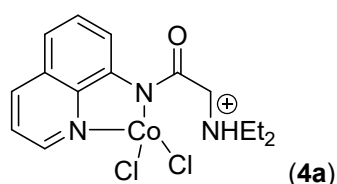

A solution of ligand **3** (0.257 g, 1.0 mmol) in THF (10 mL) was added dropwise to the anhydrous CoCl<sub>2</sub> (0.130 g, 1.0 mmol) in THF (10 mL) and the reaction mixture was stirred at room temperature for 12 h. The dark blue coloured precipitate obtained was filtered and washed with Et<sub>2</sub>O (5 mL x 3). Upon drying under vacuum, the dark blue complex **4a** was obtained. Yield: 0.364 g, 94%. The crystal suitable for a single-crystal X-ray diffraction was obtained from saturated solution of complex **4a** in acetonitrile at -15 °C. Elemental Analysis Calcd (%) for C, 46.53; H, 4.95; N, 10.85. Found: C, 46.24; H, 4.74; N, 10.63.

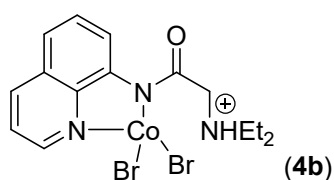

A solution of ligand **3** (0.257 g, 1.0 mmol) in THF (10 mL) was added dropwise to the anhydrous CoBr<sub>2</sub> (0.219 g, 1.0 mmol) in THF (10 mL) and the reaction mixture was stirred at room temperature for 12 h. The dark green coloured precipitate obtained was filtered and

washed with Et<sub>2</sub>O (5 mL x 3). Upon drying under vacuum, the dark green complex **4b** was obtained. Yield: 0.452 g, 95%. Elemental Analysis Calcd (%) for C, 37.84; H, 4.02; N, 8.83. Found: C, 37.52; H, 3.95; N, 9.09.

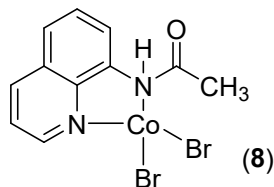

A solution of *N*-acetyl-8-aminoquinoline (0.186 g, 1.0 mmol) in THF (10 mL) was added dropwise to the anhydrous CoBr<sub>2</sub> (0.219 g, 1.0 mmol) in THF (10 mL) and the reaction mixture was stirred at room temperature for 12 h. The greenish blue solution formed was concentrated under vacuum and Et<sub>2</sub>O was added to the concentrated solution to obtain greenish blue precipitate. The decantation of the resulting solution followed by drying under vacuum yielded the greenish blue complex **8**. Yield: 0.296 g, 73%. Elemental Analysis Calcd (%) for C, 32.63; H, 2.49; N, 6.92. Found: C, 32.69; H, 2.97; N, 6.46

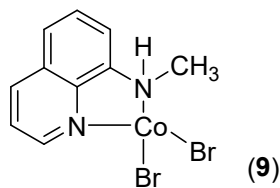

A solution of *N*-methyl-8-aminoquinoline (0.158 g, 1.0 mmol) in THF (10 mL) was added dropwise to the anhydrous CoBr<sub>2</sub> (0.219 g, 1.0 mmol) in THF (10 mL). The reaction mixture was stirred at room temperature for 12 h. The dark purple solution obtained was concentrated under vacuum and Et<sub>2</sub>O was added to precipitate the compound. Filtration of compound followed by washing with Et<sub>2</sub>O and drying yielded the dark purple complex **9**. Yield: 0.294 g, 78%. Elemental Analysis Calcd (%) for C, 31.86; H, 2.67; N, 7.43. Found: C, 32.05; H, 2.89; N, 7.58.

### 3. Representative Procedure for Hydrogenation

A Teflon screw-cap tube was introduced with catalyst **4b** (0.0048 g, 0.01 mmol), ammonia borane (0.0155 g, 0.5 mmol) and diphenylacetylene (0.089 g, 0.5 mmol) inside the glove box. The solvent MeOH (1.5 mL) was added to the reaction vessel under the argon atmosphere. The reaction mixture was then stirred at room temperature (27 °C) for 16 h. At ambient temperature, the reaction mixture was diluted with MeOH (5.0 mL) and resulting solution was concentrated under vacuum. The crude reaction mixture was purified by chromatography on silica gel using petroleum ether as eluent to obtain *Z*-stilbene **6a** (0.080 g, 89%).

**Gram scale synthesis.** Representative procedure for the hydrogenation followed, using 1.069 g (6.0 mmol) of **5a**, catalyst **4b** (0.057 g, 0.12 mmol), NH<sub>3</sub>-BH<sub>3</sub> (0.185 g, 6.0 mmol) and MeOH (15 mL). The reaction proceeded smoothly and gave an excellent yield of *Z*-stilbene (0.908 g, 5.04 mmol, 84%) which ensures synthetic applicability of the optimized protocol in the gram-scale production.

#### 4. Detailed Optimization

**Table S1. Detailed Optimization of Reaction Conditions <sup>a</sup>**

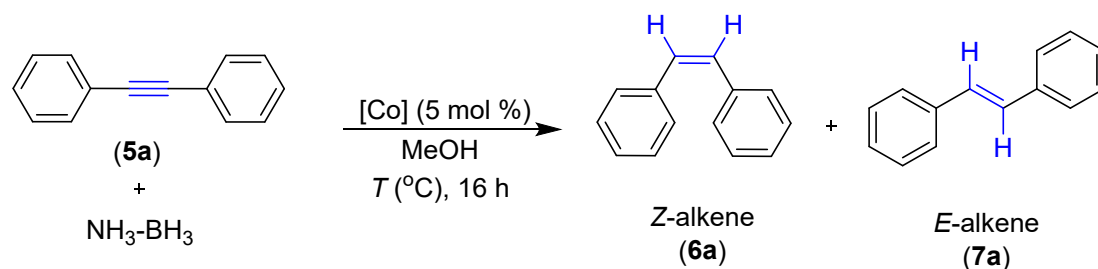

| entry             | [Co]                      | T (°C) | GC Conv | <b>6a</b> (%)               | <b>7a</b> (%) |
|-------------------|---------------------------|--------|---------|-----------------------------|---------------|
| 1                 | <b>2a</b>                 | 65     | 100     | 85                          | 14            |
| 2                 | <b>2b</b>                 | 65     | 100     | 88                          | 12            |
| 4                 | <b>4a</b>                 | 65     | 100     | 87                          | 13            |
| 5                 | <b>4b</b>                 | 65     | 100     | 84                          | 16            |
| 6 <sup>b</sup>    | <b>2a</b>                 | 65     | 75      | 61                          | 14            |
| 7 <sup>b</sup>    | <b>4a</b>                 | 65     | 100     | 81                          | 19            |
| 8                 | <b>2a</b>                 | 27     | 55      | 48                          | 7             |
| 9                 | <b>2b</b>                 | 27     | 61      | 45                          | 16            |
| 10                | <b>4a</b>                 | 27     | 100     | 87                          | 7             |
| 11                | <b>4b</b>                 | 27     | 100     | 91                          | 8             |
| 12 <sup>c</sup>   | <b>4b</b>                 | 27     | 100     | <b>94 (89%)<sup>d</sup></b> | <b>6</b>      |
| 13 <sup>e</sup>   | <b>4b</b>                 | 27     | 81      | 73                          | 7             |
| 14 <sup>b,c</sup> | <b>4b</b>                 | 27     | 35      | 24                          | 11            |
| 15 <sup>c,f</sup> | <b>4b</b>                 | 27     | 24      | 18                          | 6             |
| 16 <sup>c,g</sup> | <b>4b</b>                 | 27     | 54      | 50                          | 4             |
| 17 <sup>c,h</sup> | <b>4b</b>                 | 27     | 38      | 31                          | 7             |
| 18 <sup>c,i</sup> | <b>4b</b>                 | 27     | 65      | 42                          | 8             |
| 19 <sup>c</sup>   | $\text{CoCl}_2$           | 27     | 15      | 12                          | 3             |
| 20 <sup>c</sup>   | $\text{CoBr}_2$           | 27     | 56      | 47                          | 9             |
| 21                | $\text{Co}(\text{OAc})_2$ | 27     | 52      | 45                          | 5             |
| 22 <sup>c</sup>   | <b>2a</b>                 | 27     | 23      | 18                          | 4             |
| 23 <sup>c</sup>   | <b>2b</b>                 | 27     | 21      | 17                          | 4             |

<sup>a</sup>Reaction conditions: Diphenyl acetylene (0.051 g, 0.50 mmol),  $[\text{H}_2]$ -source (0.50 mmol), solvent (1.5 mL). <sup>b</sup> $\text{Me}_2\text{NH-BH}_3$  was used as a hydrogen source. <sup>c</sup>2 mol % loading of catalyst. <sup>d</sup>Isolated yield. <sup>e</sup>1 mol % loading of **4b**. <sup>f</sup>EtOH as solvent. <sup>g</sup>PrOH as solvent. <sup>h</sup>THF as solvent. <sup>i</sup>Toluene as solvent.

## 5. Characterization Data of *Z*-Alkenes

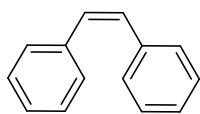

**6a**

**(*Z*)-1,2-diphenylethene (6a):**<sup>5</sup> The representative procedure was followed, using 1,2-diphenylethyne (**5a**; 0.089 g, 0.50 mmol), NH<sub>3</sub>-BH<sub>3</sub> (0.0155 g, 0.5 mmol) and catalyst **4b** (0.0048 g, 0.01 mmol). Purification by column chromatography on silica gel (petroleum ether) yielded **6a** (0.080 g, 89%) as a colourless oil. <sup>1</sup>H-NMR (500 MHz, CDCl<sub>3</sub>): δ 7.29-7.19 (m, 10H, Ar-H), 6.63 (s, 2H, CH). <sup>13</sup>C{<sup>1</sup>H}-NMR (125 MHz, CDCl<sub>3</sub>): δ 137.4 (2C, C<sub>q</sub>), 130.4 (2C, CH), 129.1 (4C, CH), 128.4 (4C, CH), 127.3 (2C, CH). HRMS (ESI): *m/z* Calcd for C<sub>14</sub>H<sub>12</sub> + H<sup>+</sup> [M + H]<sup>+</sup> 181.1017; Found 181.1012.

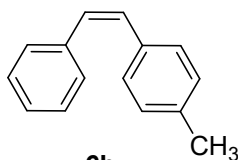

**6b**

**(*Z*)-1-methyl-4-styrylbenzene (6b):**<sup>5</sup> The representative procedure was followed, using 1-methyl-4-(phenylethynyl)benzene (**5b**; 0.096 g, 0.50 mmol), NH<sub>3</sub>-BH<sub>3</sub> (0.0155 g, 0.5 mmol) and catalyst **4b** (0.0095 g, 0.02 mmol). Purification by column chromatography on silica gel (petroleum ether) yielded **6b** (0.084 g, 86%) as a colourless oil. <sup>1</sup>H-NMR (400 MHz, CDCl<sub>3</sub>): δ 7.40 (d, *J* = 7.6 Hz, 2H, Ar-H), 7.36 (vt, *J* = 6.87, 7.63 Hz, 2H, Ar-H), 7.27-7.33 (m, 3H, Ar-H), 7.16 (d, *J* = 8.0 Hz, 2H, Ar-H), 6.69 (s, 2H, CH), 2.44 (s, 3H, CH<sub>3</sub>). <sup>13</sup>C{<sup>1</sup>H}-NMR (100 MHz, CDCl<sub>3</sub>): δ 137.7 (C<sub>q</sub>), 137 (C<sub>q</sub>), 134.4 (C<sub>q</sub>), 130.4 (CH), 129.7 (CH), 129.1 (2C, CH), 129 (2C, CH), 128.9 (2C, CH), 128.4 (2C, CH), 127.1 (CH), 21.4 (CH<sub>3</sub>). HRMS (ESI): *m/z* Calcd for C<sub>15</sub>H<sub>14</sub> + H<sup>+</sup> [M + H]<sup>+</sup> 195.1174; Found 195.1168.

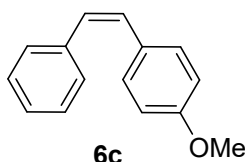

**6c**

**(*Z*)-1-methoxy-4-styrylbenzene (6c):**<sup>5</sup> The representative procedure was followed, using 1-methoxy-4-(phenylethynyl)benzene (**5c**; 0.105 g, 0.50 mmol), NH<sub>3</sub>-BH<sub>3</sub> (0.0155 g, 0.5



mmol) and catalyst **4b** (0.0071 g, 0.015 mmol). Purification by column chromatography on silica gel (petroleum ether/EtOAc: 10/1) yielded **6c** (0.091 g, 87%) as a yellow oil. <sup>1</sup>H-NMR (500 MHz, CDCl<sub>3</sub>): δ 7.34-7.26 (m, 4H, Ar-H), 7.25-7.21 (m, 3H, Ar-H), 6.82-6.79 (m, 2H, Ar-H), 6.59 (d, *J* = 12.3 Hz, 1H, CH), 6.56 (d, *J* = 12.3 Hz, 1H, CH), 3.83 (s, 3H, OCH<sub>3</sub>). <sup>13</sup>C{<sup>1</sup>H}-NMR (125 MHz, CDCl<sub>3</sub>): δ 158.9 (C<sub>q</sub>), 137.8 (C<sub>q</sub>), 130.3 (3C, CH), 129.9 (CH), 129.8 (C<sub>q</sub>), 129 (3C, CH) 128.9 (CH), 128.4 (2C, CH), 127.1 (CH), 55.4 (CH<sub>3</sub>). HRMS (ESI): *m/z* Calcd for C<sub>15</sub>H<sub>14</sub>O + H<sup>+</sup> [M + H]<sup>+</sup> 211.1123; Found 211.1117.

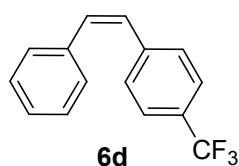

**(Z)-1-styryl-4-(trifluoromethyl)benzene (6d):**<sup>5</sup> The representative procedure was followed, using 1-(phenylethynyl)-4-(trifluoromethyl)benzene (**5d**; 0.074 g, 0.3 mmol), NH<sub>3</sub>-BH<sub>3</sub> (0.0093 g, 0.30 mmol) and catalyst **4b** (0.0043 g, 0.009 mmol). Purification by column chromatography on silica gel (petroleum ether) yielded **6d** (0.048 g, 64%) as yellow oil. <sup>1</sup>H-NMR (500 MHz, CDCl<sub>3</sub>): δ 7.47 (d, *J* = 8.4 Hz, 2H, Ar-H), 7.34 (d, *J* = 8.4 Hz, 2H, Ar-H), 7.27-7.20 (m, 5H, Ar-H), 6.73 (d, *J* = 12.9 Hz, 1H, CH), 6.60 (d, *J* = 12.3 Hz, 1H, CH). <sup>13</sup>C{<sup>1</sup>H}-NMR (125 MHz, CDCl<sub>3</sub>): δ 141.1 (C<sub>q</sub>), 136.7 (C<sub>q</sub>), 132.5 (CH), 129.3 (2C, CH), 129.0 (2C, CH), 128.9 (CH), 128.6 (2C, CH), 128.5 (q, <sup>2</sup>*J*<sub>C-F</sub> = 22.9 Hz, C<sub>q</sub>), 127.8 (CH), 125.3 (q, <sup>3</sup>*J*<sub>C-F</sub> = 3.8 Hz, 2C, CH), 124.4 (q, <sup>1</sup>*J*<sub>C-F</sub> = 271.6 Hz, CF<sub>3</sub>). <sup>19</sup>F-NMR (377 MHz, CDCl<sub>3</sub>): δ -62.5.

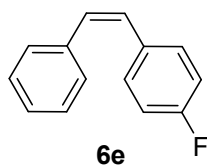

**(Z)-1-fluoro-4-styrylbenzene (6e):**<sup>5</sup> The representative procedure was followed, using 1-fluoro-4-(phenylethynyl)benzene (**5e**; 0.098 g, 0.50 mmol), NH<sub>3</sub>-BH<sub>3</sub> (0.0155 g, 0.5 mmol) and catalyst **4b** (0.0095 g, 0.02 mmol). Purification by column chromatography on silica gel (petroleum ether) yielded **6e** (0.067 g, 68%) as colourless oil. <sup>1</sup>H-NMR (400 MHz, CDCl<sub>3</sub>): δ 7.29-7.24 (m, 7H, Ar-H), 6.95 (t, *J* = 8.6 Hz, 2H, Ar-H), 6.65 (d, *J* = 12.3 Hz, 1H, CH), 6.58 (d, *J* = 12.3 Hz, 1H, CH). <sup>13</sup>C{<sup>1</sup>H}-NMR (100 MHz, CDCl<sub>3</sub>): δ 162 (d, <sup>1</sup>*J*<sub>C-F</sub> = 246.3 Hz, CF), 137.2 (C<sub>q</sub>), 133.4 (d, <sup>4</sup>*J*<sub>C-F</sub> = 3.7 Hz, C<sub>q</sub>), 130.7 (d, <sup>3</sup>*J*<sub>C-F</sub> = 8.0 Hz, 2C, CH), 130.5 (d, <sup>5</sup>*J*<sub>C-F</sub> =

1.5 Hz, CH), 129.3 (CH), 129 (2C, CH), 128.5 (2C, CH), 127.4 (CH), 115.3 (d,  $^2J_{C-F} = 21.1$  Hz, 2C, CH).  $^{19}\text{F}$ -NMR (377 MHz,  $\text{CDCl}_3$ ):  $\delta$  -114.7.

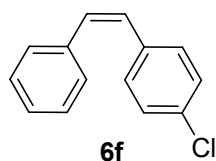

**(Z)-1-methyl-4-styrylbenzene (6f):**<sup>5</sup> The representative procedure was followed, using 1-chloro-4-(phenylethynyl)benzene (**5f**; 0.106 g, 0.50 mmol),  $\text{NH}_3\text{-BH}_3$  (0.0155 g, 0.5 mmol) and catalyst **4b** (0.0071 g, 0.015 mmol). Purification by column chromatography on silica gel (petroleum ether/EtOAc: 100/1) yielded **6f** (0.091 g, 85%) as a yellow oil.  $^1\text{H}$ -NMR (500 MHz,  $\text{CDCl}_3$ ):  $\delta$  7.25-7.21 (m, 5H, Ar-H), 7.20-7.16 (m, 4H, Ar-H), 6.64 (d,  $J = 12.2$  Hz, 1H, CH), 6.54 (d,  $J = 12.2$  Hz, 1H, CH).  $^{13}\text{C}\{^1\text{H}\}$ -NMR (125 MHz,  $\text{CDCl}_3$ ):  $\delta$  137 ( $\text{C}_q$ ), 135.8 ( $\text{C}_q$ ), 132.9 ( $\text{C}_q$ ), 131.1 (CH), 130.4 (2C, CH), 129.1 (CH), 129 (2C, CH), 128.6 (2C, CH), 128.5 (2C, CH), 127.5 (CH). HRMS (ESI):  $m/z$  Calcd for  $\text{C}_{14}\text{H}_{11}\text{Cl} + \text{H}^+$  [ $\text{M} + \text{H}$ ]<sup>+</sup> 215.0628; Found 215.0622.

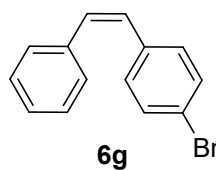

**(Z)-1-bromo-4-styrylbenzene (6g):**<sup>6</sup> The representative procedure was followed, using 1-bromo-4-(phenylethynyl)benzene (**5g**; 0.077 g, 0.30 mmol),  $\text{NH}_3\text{-BH}_3$  (0.0093 g, 0.3 mmol) and catalyst **4b** (0.0043 g, 0.009 mmol). Purification by column chromatography on silica gel (petroleum ether/EtOAc: 100/1) yielded **6g** (0.049 g, 63%) as yellow oil.  $^1\text{H}$ -NMR (400 MHz,  $\text{CDCl}_3$ ):  $\delta$  7.36-7.34 (m, 2H, Ar-H), 7.28-7.22 (m, 5H, Ar-H), 7.13-7.11 (m, 2H, Ar-H), 6.65 (d,  $J = 12.3$  Hz, 1H, CH), 6.52 (d,  $J = 12.1$  Hz, 1H, CH).  $^{13}\text{C}\{^1\text{H}\}$ -NMR (100 MHz,  $\text{CDCl}_3$ ):  $\delta$  137 ( $\text{C}_q$ ), 136.3 ( $\text{C}_q$ ), 131.5 (2C, CH), 131.2 (CH), 130.7 (2C, CH), 129.1 (CH), 129 (2C, CH), 128.5 (2C, CH), 127.5 (CH), 121.1 ( $\text{C}_q$ ).

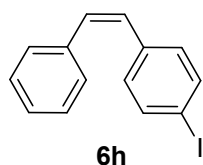

**(Z)-1-iodo-4-styrylbenzene (6h):**<sup>7</sup> The representative procedure was followed, using 1-iodo-4-(phenylethynyl)benzene (**5h**; 0.152 g, 0.50 mmol),  $\text{NH}_3\text{-BH}_3$  (0.0155 g, 0.5 mmol) and catalyst **4b** (0.0071 g, 0.015 mmol). Purification by column chromatography on silica gel (petroleum ether/EtOAc: 100/1) yielded **6h** (0.127 g, 83%) as white powder.  $^1\text{H-NMR}$  (400 MHz,  $\text{CDCl}_3$ ):  $\delta$  7.59-7.56 (m, 2H, Ar-H), 7.29-7.24 (m, 5H, Ar-H), 7.02 (d,  $J = 8.1$  Hz, 2H, Ar-H), 6.68 (d,  $J = 12.1$  Hz, 1H, CH), 6.53 (d,  $J = 12.1$  Hz, 1H, CH).  $^{13}\text{C}\{^1\text{H}\}$ -NMR (100 MHz,  $\text{CDCl}_3$ ):  $\delta$  137.5 (2C, CH), 137 (C<sub>q</sub>), 136.8 (C<sub>q</sub>), 131.3 (CH), 130.9 (2C, CH), 129.2 (CH), 128.9 (2C, CH), 128.5 (2C, CH), 127.5 (CH), 92.7 (C<sub>q</sub>).

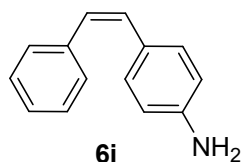

**(Z)-4-styrylaniline (6i):**<sup>5</sup> The representative procedure was followed, using 4-(phenylethynyl)aniline (**5i**; 0.097 g, 0.50 mmol),  $\text{NH}_3\text{-BH}_3$  (0.0155 g, 0.5 mmol) and catalyst **4b** (0.0095 g, 0.02 mmol). Purification by column chromatography on silica gel (petroleum ether/EtOAc: 5/1) yielded **6i** (0.084 g, 86%) as a brown oil.  $^1\text{H-NMR}$  (500 MHz,  $\text{CDCl}_3$ ):  $\delta$  7.34-7.18 (m, 5H, Ar-H), 7.09 (d,  $J = 8.4$  Hz, 2H, Ar-H), 6.55 (d,  $J = 8.4$  Hz, 2H, Ar-H), 6.50 (d,  $J = 12.2$  Hz, 1H, CH), 6.45 (d,  $J = 12.2$  Hz, 1H, CH), 3.69 (s, 2H,  $\text{NH}_2$ ).  $^{13}\text{C}\{^1\text{H}\}$ -NMR (125 MHz,  $\text{CDCl}_3$ ):  $\delta$  145.6 (C<sub>q</sub>), 138.1 (C<sub>q</sub>), 130.3 (CH), 130.3 (2C, CH), 129 (2C, CH), 128.3 (2C, CH), 127.8 (CH), 127.7 (C<sub>q</sub>), 126.9 (CH), 114.9 (2C, CH). HRMS (ESI):  $m/z$  Calcd for  $\text{C}_{14}\text{H}_{13}\text{N} + \text{H}^+$  [M + H]<sup>+</sup> 196.1126; Found 196.1121.

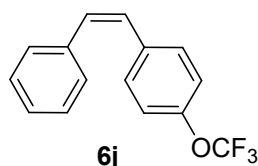

**(Z)-1-styryl-4-(trifluoromethoxy)benzene (6j):** The representative procedure was followed, using 1-(phenylethynyl)-4-(trifluoromethoxy)benzene (**5j**; 0.131 g, 0.50 mmol),  $\text{NH}_3\text{-BH}_3$  (0.0155 g, 0.5 mmol) and catalyst **4b** (0.0095 g, 0.02 mmol). Purification by column chromatography on silica (petroleum ether/EtOAc: 10/1) yielded **6j** (0.103 g, 78%) as a

colourless oil.  $^1\text{H-NMR}$  (400 MHz,  $\text{CDCl}_3$ ):  $\delta$  7.18-7.14 (m, 7H, Ar-H), 6.98 (d,  $J = 8.4$  Hz, 2H, Ar-H), 6.58 (d,  $J = 12.3$  Hz, 1H, Ar-H), 6.48 (d,  $J = 12.3$  Hz, 1H, Ar-H).  $^{13}\text{C}\{^1\text{H}\}$ -NMR (100 MHz,  $\text{CDCl}_3$ ):  $\delta$  148.3 ( $\text{C}_q$ ), 137 ( $\text{C}_q$ ), 136.1 ( $\text{C}_q$ ), 131.4 (CH), 130.5 (2C, CH), 129 (2C, CH), 128.9 (CH), 128.6 (3C, CH), 127.6 (CH), 120.8 (CH), 120.6 (q,  $^1J_{\text{C-F}} = 257.2$  Hz,  $\text{CF}_3$ ).  $^{19}\text{F-NMR}$  (377 MHz,  $\text{CDCl}_3$ ):  $\delta$  -57.8 (s). HRMS (ESI):  $m/z$  Calcd for  $\text{C}_{15}\text{H}_{11}\text{OF}_3 + \text{H}^+ [\text{M} + \text{H}]^+$  265.0840; Found 265.0835.

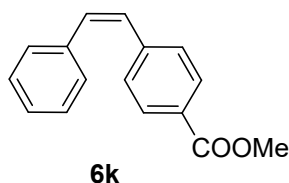

**methyl (Z)-4-styrylbenzoate (6k):**<sup>5</sup> The representative procedure was followed, using methyl 4-(phenylethynyl)benzoate (**5k**; 0.118 g, 0.50 mmol),  $\text{NH}_3\text{-BH}_3$  (0.015 g, 0.5 mmol) and catalyst **4b** (0.0071 g, 0.015 mmol). Purification by column chromatography on silica (petroleum ether/EtOAc: 10/1) yielded **6k** (0.097 g, 81%) as a yellow oil.  $^1\text{H-NMR}$  (400 MHz,  $\text{CDCl}_3$ ):  $\delta$  7.94 (d,  $J = 8.4$  Hz, 2H, Ar-H), 7.36-7.35 (d,  $J = 8.4$  Hz, 2H, Ar-H), 7.27 (br s, 5H, Ar-H), 6.76 (d,  $J = 12.6$  Hz, 1H, CH), 6.66 (d,  $J = 12.2$  Hz, 1H, CH), 3.95 (s, 3H,  $\text{CH}_3$ ).  $^{13}\text{C}\{^1\text{H}\}$ -NMR (100 MHz,  $\text{CDCl}_3$ ):  $\delta$  167.1 ( $\text{C}_q$ , CO), 142.3 ( $\text{C}_q$ ), 136.8 ( $\text{C}_q$ ), 132.4 (CH), 129.7 (2C, CH), 129.4 (CH), 129 (4C, CH), 128.8 ( $\text{C}_q$ ), 128.5 (2C, CH), 127.7 (CH), 52.2 ( $\text{CH}_3$ ). HRMS (ESI):  $m/z$  Calcd for  $\text{C}_{16}\text{H}_{14}\text{O}_2 + \text{H}^+ [\text{M} + \text{H}]^+$  239.1072; Found 239.1067.

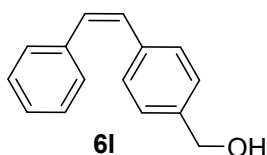

**(Z)-(4-styrylphenyl)methanol (6l):**<sup>8</sup> The representative procedure was followed, using (4-(phenylethynyl)phenyl)methanol (**5l**; 0.104 g, 0.50 mmol),  $\text{NH}_3\text{-BH}_3$  (0.0155 g, 0.5 mmol) and catalyst **4b** (0.0071 g, 0.015 mmol). Purification by column chromatography on silica gel (petroleum ether/EtOAc: 10/1) yielded **6l** (0.091 g, 87%) as a brown oil.  $^1\text{H-NMR}$  (500 MHz,  $\text{CDCl}_3$ ):  $\delta$  7.35-7.22 (m, 9H, Ar-H), 6.67 (d,  $J = 12.2$  Hz, 1H, CH), 6.63 (d,  $J = 12.2$  Hz, 1H, CH), 4.68 (s, 2H,  $\text{CH}_2$ ), 1.88 (s, 1H, OH).  $^{13}\text{C}\{^1\text{H}\}$ -NMR (125 MHz,  $\text{CDCl}_3$ ):  $\delta$  139.8 ( $\text{C}_q$ ), 137.4 ( $\text{C}_q$ ), 136.8 ( $\text{C}_q$ ), 130.5 (CH), 130 (CH), 129.2 (2C, CH), 129 (2C, CH), 128.4 (2C, CH), 127.3 (CH), 127.1 (2C, CH), 65.3 ( $\text{CH}_2$ ). HRMS (ESI):  $m/z$  Calcd for  $\text{C}_{15}\text{H}_{14}\text{O} + \text{H}^+ [\text{M} + \text{H}]^+$  211.1123; Found 211.1117.

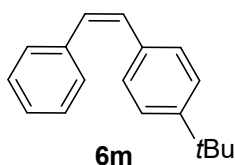

**(Z)-1-(tert-butyl)-4-styrylbenzene (6m):**<sup>9</sup> The representative procedure was followed, using 1-(tert-butyl)-4-(phenylethynyl)benzene (**5m**; 0.117 g, 0.50 mmol), NH<sub>3</sub>-BH<sub>3</sub> (0.0155 g, 0.5 mmol) and catalyst **4b** (0.0048 g, 0.01 mmol). Purification by column chromatography on silica gel (petroleum ether) yielded **6m** (0.103 g, 87%) as a colourless oil. <sup>1</sup>H-NMR (500 MHz, CDCl<sub>3</sub>): δ 7.35-7.22 (m, 9H, Ar-H), 6.60 (s, 2H, CH), 1.34 (s, 9H, CH<sub>3</sub>). <sup>13</sup>C{<sup>1</sup>H}-NMR (125 MHz, CDCl<sub>3</sub>): δ 150.3 (C<sub>q</sub>), 137.8 (C<sub>q</sub>), 134.4 (C<sub>q</sub>), 130.3 (CH), 129.5 (CH), 129 (2C, CH), 128.8 (2C, CH), 128.4 (2C, CH), 127.1 (CH), 125.3 (2C, CH), 34.7 (C<sub>q</sub>), 31.5 (3C, CH<sub>3</sub>). HRMS (ESI): *m/z* Calcd for C<sub>18</sub>H<sub>20</sub> + H<sup>+</sup> [M + H]<sup>+</sup> 237.1643; Found 237.1638.

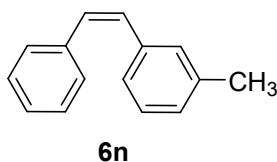

**(Z)-1-methyl-3-styrylbenzene (6n):**<sup>5</sup> The representative procedure was followed, using 1-methyl-3-(phenylethynyl)benzene (**5n**; 0.096 g, 0.50 mmol), NH<sub>3</sub>-BH<sub>3</sub> (0.0155 g, 0.5 mmol) and catalyst **4b** (0.0071 g, 0.015 mmol). Purification by column chromatography on silica gel (petroleum ether) yielded **6n** (0.081 g, 83%) as a colourless solid. <sup>1</sup>H-NMR (500 MHz, CDCl<sub>3</sub>): δ 7.36-7.27 (m, 5H, Ar-H), 7.21-7.13 (m, 3H, Ar-H), 7.10-7.09 (d, *J* = 6.9 Hz, 1H, Ar-H), 6.66 (s, 2H, CH), 2.35 (s, 3H, CH<sub>3</sub>). <sup>13</sup>C{<sup>1</sup>H}-NMR (125 MHz, CDCl<sub>3</sub>): δ 137.9 (C<sub>q</sub>), 137.5 (C<sub>q</sub>), 137.3 (C<sub>q</sub>), 130.5 (CH), 130.2 (CH), 129.8 (CH), 129 (2C, CH), 128.3 (2C, CH), 128.2 (CH), 128 (CH), 127.2 (CH), 126 (CH), 21.5 (CH<sub>3</sub>). HRMS (ESI): *m/z* Calcd for C<sub>15</sub>H<sub>14</sub> + H<sup>+</sup> [M + H]<sup>+</sup> 195.1174; Found 195.1168.

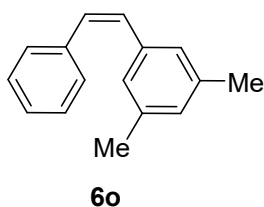

**(Z)-1,3-dimethyl-5-styrylbenzene (6o):** The representative procedure was followed, using 1,3-dimethyl-5-(phenylethynyl)benzene (**5o**; 0.103 g, 0.50 mmol), NH<sub>3</sub>-BH<sub>3</sub> (0.0155 g, 0.5 mmol) and catalyst **4b** (0.0071 g, 0.015 mmol). Purification by column chromatography on

silica gel (petroleum ether) yielded **6o** (0.079 g, 76%) as a yellow oil.  $^1\text{H-NMR}$  (400 MHz,  $\text{CDCl}_3$ ):  $\delta$  7.18 (d,  $J = 7.1$  Hz, 2H, Ar-H), 7.15-7.09 (m, 3H, Ar-H), 6.80 (s, 2H, Ar-H), 6.75 (s, 1H, Ar-H), 6.46 (s, 2H, CH), 2.13 (s, 6H,  $\text{CH}_3$ ).  $^{13}\text{C}\{^1\text{H}\}$ -NMR (100 MHz,  $\text{CDCl}_3$ ):  $\delta$  137.8 (2C,  $\text{C}_q$ ), 137.6 ( $\text{C}_q$ ), 137.3 ( $\text{C}_q$ ), 130.6 (CH), 130.1 (CH), 129.1 (2C, CH), 128.9 (CH), 128.3 (2C, CH), 127.2 (CH), 126.8 (2C, CH), 21.4 (2C,  $\text{CH}_3$ ). HRMS (ESI):  $m/z$  Calcd for  $\text{C}_{16}\text{H}_{16} + \text{H}^+ [\text{M} + \text{H}]^+$  209.1330; Found 209.1325.

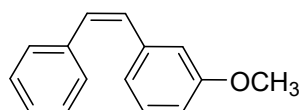

**6p**

**(Z)-1-methoxy-3-styrylbenzene (6p):**<sup>9</sup> The representative procedure was followed, using 1-methoxy-3-(phenylethynyl)benzene (**5p**; 0.104 g, 0.50 mmol),  $\text{NH}_3\text{-BH}_3$  (0.0155 g, 0.5 mmol) and catalyst **4b** (0.0071 g, 0.015 mmol). Purification by column chromatography on silica gel (petroleum ether/EtOAc: 5/1) yielded **6p** (0.078 g, 74%) as a colourless oil.  $^1\text{H-NMR}$  (500 MHz,  $\text{CDCl}_3$ ):  $\delta$  7.30-7.14 (m, 6H, Ar-H), 6.85 (d,  $J = 7.6$  Hz, 1H, Ar-H), 6.80 (vt,  $J = 2.3$  Hz, 1H, Ar-H), 6.76 (dd,  $J = 8.4, 2.3$  Hz, 1H, Ar-H), 6.64 (d,  $J = 12.2$  Hz, 1H, CH), 6.58 (d,  $J = 12.2$  Hz, 1H, CH), 3.66 (s, 3H,  $\text{CH}_3$ ).  $^{13}\text{C}\{^1\text{H}\}$ -NMR (125 MHz,  $\text{CDCl}_3$ ):  $\delta$  159.5 ( $\text{C}_q$ ), 138.7 ( $\text{C}_q$ ), 137.4 ( $\text{C}_q$ ), 130.7 (CH), 130.3 (CH), 129.4 (CH), 129.1 (2C, CH), 128.4 (2C, CH), 127.3 (CH), 121.7 (CH), 113.9 (CH), 113.5 (CH), 55.2 ( $\text{CH}_3$ ). HRMS (ESI):  $m/z$  Calcd for  $\text{C}_{15}\text{H}_{14}\text{O} + \text{H}^+ [\text{M} + \text{H}]^+$  211.1123; Found 211.1117.

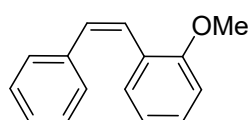

**6q**

**(Z)-1-methoxy-2-styrylbenzene (6q):** The representative procedure was followed, using 1-methoxy-2-(phenylethynyl)benzene (**5q**; 0.104 g, 0.50 mmol),  $\text{NH}_3\text{-BH}_3$  (0.0155 g, 0.5 mmol) and catalyst **4b** (0.0071 g, 0.015 mmol). Purification by column chromatography on silica gel (petroleum ether/EtOAc: 10:1) yielded **6q** (0.096 g, 91%) as a yellow oil.  $^1\text{H-NMR}$  (500 MHz,  $\text{CDCl}_3$ ):  $\delta$  7.25-7.15 (m, 7H, Ar-H), 6.89 (d,  $J = 8.4$  Hz, 1H, Ar-H), 6.76 (t,  $J = 7.6$  Hz, 1H, Ar-H), 6.71 (d,  $J = 12.2$  Hz, 1H, CH), 6.64 (d,  $J = 12.2$  Hz, 1H, CH) 3.82 (s, 3H,  $\text{CH}_3$ ).  $^{13}\text{C}\{^1\text{H}\}$ -NMR (125 MHz,  $\text{CDCl}_3$ ):  $\delta$  157.4 ( $\text{C}_q$ ), 137.5 ( $\text{C}_q$ ), 130.4 (CH), 130.3 (CH), 129 (2C, CH), 128.8 (CH), 128.2 (2C, CH), 127.1 (CH), 126.5 ( $\text{C}_q$ ), 126 (CH), 120.8 (CH),

110.9 (CH), 55.6 (CH<sub>3</sub>). HRMS (ESI):  $m/z$  Calcd for C<sub>15</sub>H<sub>14</sub>O + H<sup>+</sup> [M + H]<sup>+</sup> 211.1123; Found 211.1117.

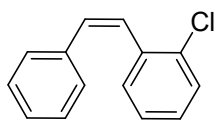

**6r**

**(Z)-1-chloro-2-styrylbenzene (6r):** The representative procedure was followed, using 1-chloro-2-(phenylethynyl)benzene (**5r**; 0.106 g, 0.50 mmol), NH<sub>3</sub>-BH<sub>3</sub> (0.015 g, 0.5 mmol) and catalyst **4b** (0.007 g, 0.015 mmol). Purification by column chromatography on silica gel (petroleum ether/EtOAc: 20/1) yielded **6r** (0.087 g, 81%) as a yellow oil. <sup>1</sup>H-NMR (400 MHz, CDCl<sub>3</sub>): δ 7.42 (d,  $J$  = 8.0 Hz, 1H, Ar-H), 7.22-7.16 (m, 7H, Ar-H), 7.05 (t,  $J$  = 7.5 Hz, 1H, Ar-H), 6.74 (d,  $J$  = 12.3 Hz, 1H, CH), 6.69 (d,  $J$  = 12.3 Hz, 1H, CH). <sup>13</sup>C{<sup>1</sup>H}-NMR (100 MHz, CDCl<sub>3</sub>): δ 136.6 (C<sub>q</sub>), 136.2 (C<sub>q</sub>), 133.9 (C<sub>q</sub>), 131.9 (CH), 130.9 (CH), 129.7 (CH), 129.2 (2C, CH), 128.7 (CH), 128.4 (2C, CH), 127.5 (CH), 127.4 (CH), 126.5 (CH). HRMS (ESI):  $m/z$  Calcd for C<sub>14</sub>H<sub>11</sub>Cl + H<sup>+</sup> [M + H]<sup>+</sup> 215.0628; Found 215.0622.

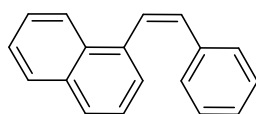

**6s**

**(Z)-1-styrylnaphthalene (6s):**<sup>6</sup> The representative procedure was followed, using 1-(phenylethynyl)naphthalene (**5s**; 0.114 g, 0.50 mmol), NH<sub>3</sub>-BH<sub>3</sub> (0.0155 g, 0.5 mmol) and catalyst **4b** (0.0071 g, 0.015 mmol). Purification by column chromatography on silica gel (petroleum ether) yielded **6s** (0.090 g, 78%) as a colourless solid. <sup>1</sup>H-NMR (500 MHz, CDCl<sub>3</sub>): δ 8.11-8.09 (m, 1H, Ar-H), 7.91-7.90 (s, 1H, Ar-H), 7.81 (d,  $J$  = 7.6 Hz, 1H, Ar-H), 7.54-7.49 (m, 2H, Ar-H), 7.39-7.34 (m, 2H, Ar-H), 7.11 (s, 5H, Ar-H), 7.08 (d,  $J$  = 12.2 Hz, 1H, CH), 6.86 (d,  $J$  = 12.2 Hz, 1H, CH). <sup>13</sup>C{<sup>1</sup>H}-NMR (125 MHz, CDCl<sub>3</sub>): δ 136.9 (C<sub>q</sub>), 135.4 (C<sub>q</sub>), 133.8 (C<sub>q</sub>), 132.2 (CH), 131.7 (C<sub>q</sub>), 129.2 (2C, CH), 128.7 (CH), 128.6 (CH), 128.2 (2C, CH), 127.7 (CH), 127.3 (CH), 126.6 (CH), 126.2 (CH), 126.1 (CH), 125.8 (CH), 125.0 (CH). HRMS (ESI):  $m/z$  Calcd for C<sub>18</sub>H<sub>14</sub> + H<sup>+</sup> [M + H]<sup>+</sup> 231.1174; Found 231.1168.

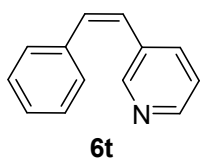

**(Z)-3-styrylpyridine (6t):** The representative procedure was followed, using 3-(phenylethynyl)pyridine (**5t**; 0.054 g, 0.30 mmol),  $\text{NH}_3\text{-BH}_3$  (0.0093 g, 0.3 mmol) and catalyst **4b** (0.0043 g, 0.009 mmol). Purification by column chromatography on silica (petroleum ether/EtOAc: 5/1) yielded **6t** (0.046 g, 85%) as a brown oil.  $^1\text{H-NMR}$  (500 MHz,  $\text{CDCl}_3$ ):  $\delta$  8.54-8.53 (d,  $J = 1.5$  Hz, 1H, Ar-H), 8.47 (dd,  $J = 5.0, 4.6$  Hz, 1H, Ar-H), 7.56 (d,  $J = 8.0$  Hz, 1H, Ar-H), 7.32-7.26 (m, 5H, Ar-H), 7.17 (dd,  $J = 8.0, 5.0$  Hz, 1H, Ar-H), 6.80 (d,  $J = 12.2$  Hz, 1H, CH), 6.60 (d,  $J = 12.2$  Hz, 1H, CH).  $^{13}\text{C}\{^1\text{H}\}$ -NMR (125 MHz,  $\text{CDCl}_3$ ):  $\delta$  150.3 (CH), 148.2 (CH), 136.7 ( $\text{C}_q$ ), 136 (CH), 133.1 ( $\text{C}_q$ ), 132.9 (CH), 128.8 (2C, CH), 128.7 (2C, CH), 127.7 (CH), 126.6 (CH), 123.2 (CH). HRMS (ESI):  $m/z$  Calcd for  $\text{C}_{13}\text{H}_{11}\text{N} + \text{H}^+ [\text{M} + \text{H}]^+$  182.0970; Found 182.0964.

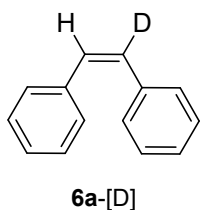

**(Z)-(Ethene-1,2-diyl-1-d)dibenzene (6a-[D]):** The representative procedure was followed, using 1,2-diphenylethyne (**5a**; 0.089 g, 0.50 mmol),  $\text{NH}_3\text{-BH}_3$  (0.0155 g, 0.5 mmol) and catalyst **4b** (0.0048 g, 0.01 mmol) in  $\text{CD}_3\text{OD}$ . Purification by column chromatography on silica gel (petroleum ether) yielded **6a-[D]** (0.078 g, 86%) as a colourless oil.  $^1\text{H-NMR}$  (500 MHz,  $\text{CDCl}_3$ ):  $\delta$  7.29-7.19 (m, 10H, Ar-H), 6.63 (1H, CH).  $^{13}\text{C}\{^1\text{H}\}$ -NMR (125 MHz,  $\text{CDCl}_3$ ):  $\delta$  137.4 ( $\text{C}_q$ ), 137.3 ( $\text{C}_q$ ), 130.4 (CH), 130.3 (CH), 129.1 (CH), 128.4 (CH), 127.3 (CH).



## 6. Unsuccessful Substrates

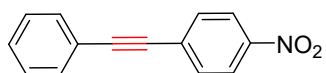

(42 : 28 : 28)  
(Z : E : A)

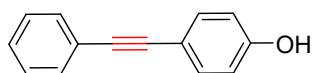

No Reaction

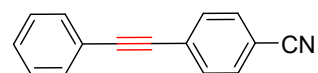

Multiple spots on the TLC

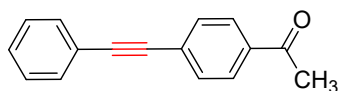

Multiple products

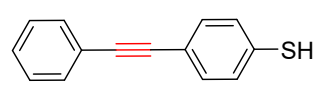

No reaction

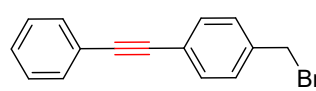

trace conv, no selectivity

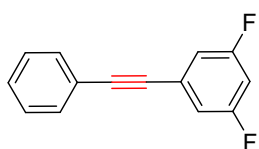

Mixture of products  
no selectivity

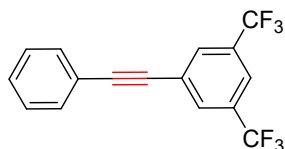

trace conv, no selectivity

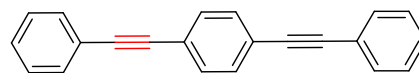

Multiple products

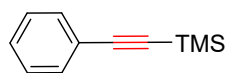

very less conversion at rt  
multiple products at 50 °C

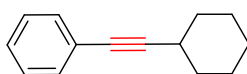

No reaction at rt  
multiple products at 50 °C

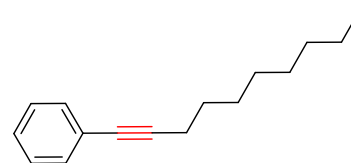

No reaction at rt  
multiple products at 50 °C

## 7. Mechanistic Experiments

**Procedure for Rate of Reaction (Electronic Effect).** To a flame dried screw-cap tube equipped with magnetic stir bar were introduced 1-methoxy-4-(phenylethynyl)benzene (**5c**, 0.042 g, 0.2 mmol) or 1-(phenylethynyl)-4-(trifluoromethyl)benzene (**5d**, 0.049 g, 0.2 mmol),  $\text{NH}_3\text{-BH}_3$  (0.006 g, 0.2 mmol), **4b** (0.0029 g, 3 mol %), *n*-dodecane (0.025 mL, 0.11 mmol, internal standard) and MeOH (1.5 mL) inside the glove-box. The reaction mixture was then stirred at room temperature on magnetic stirrer. At regular intervals (2.5, 5, 10, 15, 20, 25, 30, 35 min), the reaction vessel was taken to glove box and an aliquot of sample was withdrawn to the GC vial. The sample was diluted with MeOH and subjected to GC analysis. The concentration of product **6c** or **6d** obtained in each sample was determined with respect to the internal standard *n*-dodecane. The data of the concentration of the product **6c** or **6d** versus time (min) plot was drawn (Figure S1 ) with Origin Pro 8.5, and the rate was determined by initial rate method (up to 35 min). The data were taken from the average of two independent experiments. The initial rate obtained for the transfer hydrogenation of 1-methoxy-4-(phenylethynyl)benzene (**5c**) was  $1.02 \times 10^{-3} \text{ Mmin}^{-1}$ . Similarly, the rate for the transfer hydrogenation of 1-(phenylethynyl)-4-(trifluoromethyl)benzene (**5d**) was  $0.77 \times 10^{-3} \text{ Mmin}^{-1}$ . Therefore, the rate (4-OMe)/ rate (4-CF<sub>3</sub>) =  $1.02 \times 10^{-3} / 0.77 \times 10^{-3} = 1.32$ .

**Table S2.** Time-dependent formation of product **6c** or **6d** from **5c** and **5d**.

| Time (min) | <b>6c</b> [M] | <b>6d</b> [M] |
|------------|---------------|---------------|
| 2.5        | 0.0240        | 0.0249        |
| 5          | 0.0319        | 0.0272        |
| 10         | 0.0345        | 0.0303        |
| 15         | 0.0396        | 0.0328        |
| 20         | 0.0442        | 0.0355        |
| 25         | 0.0499        | 0.0413        |
| 30         | 0.0538        | 0.0474        |
| 35         | 0.0603        | 0.0496        |

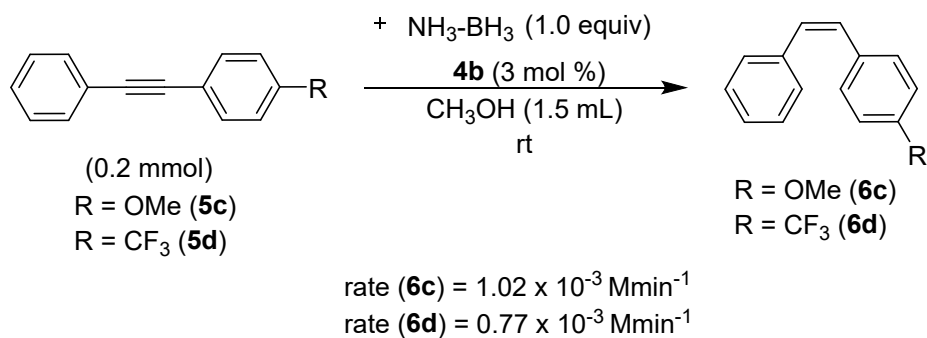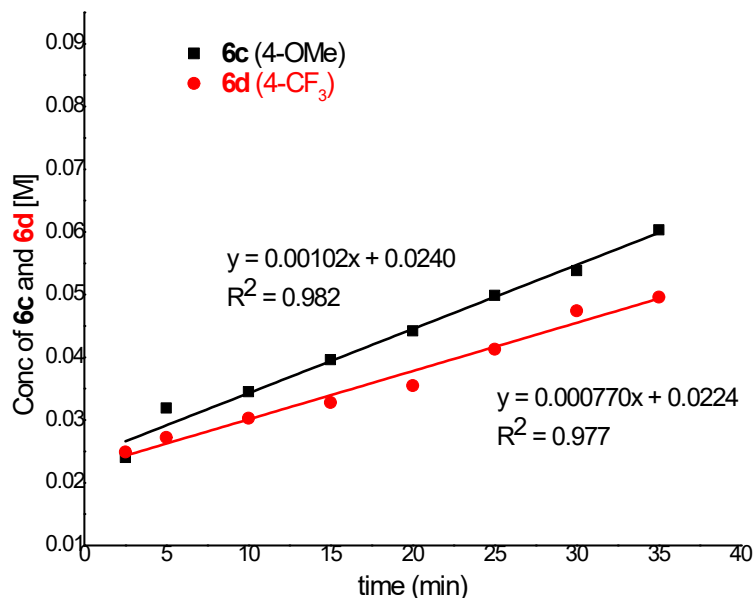

**Figure S1.** Time dependent formation of product **6c** or **6d** from **5c** and **5d**.

**Procedure for Competition Experiment (Electronic Effect).** To a flame dried screw-cap tube equipped with magnetic stir bar were introduced 1-methoxy-4-(phenylethynyl)benzene (**5c**, 0.042 g, 0.2 mmol) or 1-(phenylethynyl)-4-(trifluoromethyl)benzene (**5d**, 0.049 g, 0.2 mmol), NH<sub>3</sub>-BH<sub>3</sub> (0.006 g, 0.2 mmol), **4b** (0.0029 g, 3 mol %), and MeOH (1 mL) inside the glove-box. The reaction mixture was then stirred at room temperature on magnetic stirrer for 30 min. After that the reaction was quenched with MeOH and purification by column chromatography on silica gel yielded product **6c** (0.068 mmol) and **6d** (0.058 mmol).

**Procedure for Deuterium Labelling Experiment.** A Teflon screw-cap tube equipped with magnetic bar was introduced the catalyst **4b** (0.0048 g, 0.01 mmol), ammonia borane (0.0155 g, 0.5 mmol) and diphenylacetylene (0.089 g, 0.5 mmol) inside the glove box. The solvent CD<sub>3</sub>OD (1.5 mL) was added to the reaction vessel under the argon atmosphere. The reaction mixture was then stirred at room temperature (27 °C) for 16 h. At ambient temperature, the reaction mixture was diluted with MeOH (5.0 mL) and resulting solution was concentrated under vacuum. The crude reaction mixture was then purified by flash chromatography using petroleum ether as eluent to obtain deuterated *Z*-stilbene **6a**-[D] (0.078 g, 86%).

**Procedure for Attempted Over-Hydrogenation using Excess of H<sub>3</sub>NBH<sub>3</sub> (from **5a**).** A Teflon screw-cap tube equipped with magnetic bar was introduced the catalyst **4b** (0.0048 g, 0.01 mmol), ammonia borane (0.031 g, 1 mmol) and diphenylacetylene (0.089 g, 0.5 mmol) inside the glove box. The solvent MeOH (2 mL) was added to the reaction vessel under the argon atmosphere. The reaction mixture was then stirred at room temperature (27 °C) for 16 h. At ambient temperature, the reaction mixture was diluted with MeOH (5.0 mL) and resulting solution was concentrated under vacuum. The crude reaction mixture was then purified by flash chromatography using petroleum ether as eluent to obtain *Z*-stilbene **6a** (0.067 g, 74%).

**Procedure for Attempted Isomerization of *Z*-Stilbene.** A Teflon screw-cap tube equipped with magnetic bar was introduced the catalyst **4b** (0.0048 g, 0.01 mmol), ammonia borane (0.0155 g, 0.5 mmol) and *Z*-stilbene (0.090 g, 0.5 mmol) inside the glove box. The solvent MeOH (1.5 mL) was added to the reaction vessel under the argon atmosphere. The reaction mixture was then stirred at 60 °C for 16 h. At ambient temperature, the reaction mixture was diluted with MeOH (5.0 mL) and resulting solution was concentrated under vacuum. The crude reaction mixture was then purified by flash chromatography using petroleum ether as eluent to obtain *E*-stilbene **7a** (0.050 g, 55%).

**Time Course Experiment for Isomerization of *Z*-Stilbene.** A Teflon screw-cap tube equipped with magnetic bar was introduced the catalyst **4b** (0.001 g, 0.002 mmol), ammonia borane (0.003 g, 0.1 mmol), *n*-dodecane (0.025 mL, 0.11 mmol, internal standard) and *Z*-stilbene (0.018 g, 0.1 mmol) inside the glove box. The solvent MeOH (1 mL) was added to the reaction vessel under the argon atmosphere. The reaction mixture was then stirred at 60

°C. At regular intervals (5, 10, 20, 20, 30, 60, 120, 180, 300, 420 min), the reaction vessel was taken to the glove box and an aliquot of sample was withdrawn to the GC vial. The sample was diluted with MeOH and subjected to GC analysis. The concentration of **6a** and **7a** in each sample was determined with respect to the internal standard *n*-dodecane (Table S3). The data of the concentration of **6a** and **7a** versus time (min) plot was drawn (Figure S2) with Origin Pro 8.5

**Table S3.** Time-dependent formation of product **7a** from **6a**.

| Time (min) | <b>6a</b> [M] | <b>7a</b> [M] |
|------------|---------------|---------------|
| 0          | 0.1           | 0             |
| 5          | 0.082         | 0.018         |
| 10         | 0.076         | 0.024         |
| 20         | 0.071         | 0.029         |
| 30         | 0.068         | 0.032         |
| 60         | 0.066         | 0.034         |
| 120        | 0.064         | 0.036         |
| 180        | 0.063         | 0.037         |
| 300        | 0.061         | 0.039         |
| 420        | 0.059         | 0.041         |

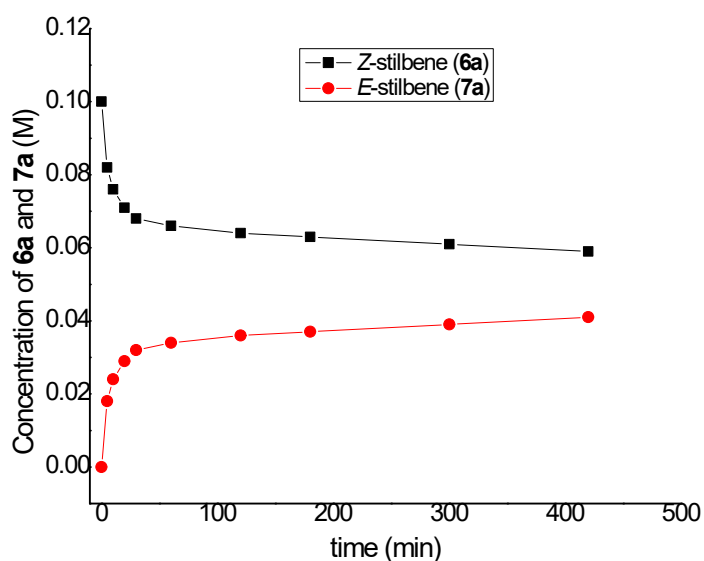

**Figure S2.** Time-dependent formation of **7a** from **6a**.

## 8. Crystallographic Data

X-ray intensity data measurements of compounds **2a** and **4a** were carried out on a Bruker D8 VENTURE Kappa Duo PHOTON II CPAD diffractometer equipped with Incoatech multilayer mirrors optics. The intensity measurements were carried out with Mo micro-focus sealed tube diffraction source ( $\text{MoK}_\alpha = 0.71073 \text{ \AA}$ ) at 100(2) K temperature. The X-ray generator was operated at 50 kV and 1.4 mA. A preliminary set of cell constants and an orientation matrix were calculated from three matrix sets of 36 frames (each matrix run consists of 12 frames). Data were collected with  $\omega$  scan width of  $0.5^\circ$  at different settings of  $\varphi$  and  $2\theta$  with a frame time of 40 secs keeping the sample-to-detector distance fixed at 5.00 cm. The X-ray data collection was monitored by APEX3 program (Bruker, 2016).<sup>10</sup> All the data were corrected for Lorentzian, polarization and absorption effects using SAINT and SADABS programs (Bruker, 2016). Using the APEX3 (Bruker) program suite, the structure was solved with the ShelXS-97(Sheldrick, 2008)<sup>11</sup> structure solution program, using direct methods. The model was refined with a version of ShelXL-2018/3 (Sheldrick, 2015)<sup>12</sup> using Least Squares minimization. All the hydrogen atoms were placed in a geometrically idealized position and constrained to ride on its parent atoms. The *ORTEP* III<sup>13</sup> view of the compounds were drawn with 50% probability displacement ellipsoids, and H atoms are shown as small spheres of arbitrary radii.

**Table S4.** Crystal data of compounds **2a** and **4a**.

| Crystal Data                                                  | Comp <b>2a</b>                                                   | Comp <b>4a</b>                                                     |
|---------------------------------------------------------------|------------------------------------------------------------------|--------------------------------------------------------------------|
| Formula                                                       | C <sub>15</sub> H <sub>21</sub> Cl <sub>2</sub> CoN <sub>3</sub> | C <sub>15</sub> H <sub>19</sub> Cl <sub>2</sub> CoN <sub>3</sub> O |
| Molecular weight                                              | 373.18 g/mol                                                     | 387.16 g/mol                                                       |
| Crystal Size, mm                                              | 0.060 x 0.110 x 0.230                                            | 0.28 x 0.18 x 0.10                                                 |
| Temp. (K)                                                     | 100(2)                                                           | 100(2)                                                             |
| Wavelength (Å)                                                | 0.71073                                                          | 0.71073                                                            |
| Crystal Syst.                                                 | monoclinic                                                       | tetragonal                                                         |
| Space Group                                                   | <i>P</i> <sub>2</sub> <sub>1</sub> / <i>c</i>                    | <i>P</i> -1                                                        |
| <i>a</i> /Å                                                   | 16.6500(9)                                                       | 7.3409(3)                                                          |
| <i>b</i> /Å                                                   | 24.8705(12)                                                      | 8.2378(3)                                                          |
| <i>c</i> /Å                                                   | 7.9667(5)                                                        | 14.1911(6)                                                         |
| $\alpha^\circ$                                                | 90                                                               | 77.2420(10)                                                        |
| $\beta^\circ$                                                 | 90.490(2)                                                        | 85.133(2)                                                          |
| $\gamma^\circ$                                                | 90                                                               | 77.2610(10)                                                        |
| <i>V</i> /Å <sup>3</sup>                                      | 3298.8(3)                                                        | 815.80(6)                                                          |
| <i>Z</i>                                                      | 8                                                                | 2                                                                  |
| <i>D</i> <sub>calc</sub> /g cm <sup>-3</sup>                  | 1.503                                                            | 1.576                                                              |
| $\mu$ /mm <sup>-1</sup>                                       | 1.361                                                            | 1.383                                                              |
| <i>F</i> (000)                                                | 1544                                                             | 398                                                                |
| <i>Ab. Correct.</i>                                           | multi-scan                                                       | multi-scan                                                         |
| <i>T</i> <sub>min</sub> / <i>T</i> <sub>max</sub>             | 0.745/0.9230                                                     | 0.698/0.874                                                        |
| 2 $\theta$ <sub>max</sub>                                     | 56.00                                                            | 56.00                                                              |
| Total reflns.                                                 | 49368                                                            | 20029                                                              |
| Unique reflns.                                                | 6459                                                             | 3915                                                               |
| Obs. reflns.                                                  | 5975                                                             | 3761                                                               |
| <i>h, k, l</i> (min, max)                                     | (-20, 20), (-27, 30), (-9, 0)                                    | (-9, 9), (-10, 10), (-18, 18)                                      |
| R <sub>int</sub> / R <sub>sig</sub>                           | 0.0451 / 0.0254                                                  | 0.0219 / 0.0172                                                    |
| No. of parameters                                             | 384                                                              | 206                                                                |
| <i>RI</i> [ <i>I</i> > 2 $\sigma$ ( <i>I</i> )]               | 0.0439                                                           | 0.0193                                                             |
| <i>wR2</i> [ <i>I</i> > 2 $\sigma$ ( <i>I</i> )]              | 0.0834                                                           | 0.0518                                                             |
| <i>RI</i> [all data]                                          | 0.0481                                                           | 0.0526                                                             |
| <i>wR2</i> [all data]                                         | 0.0855                                                           | 0.0822                                                             |
| goodness-of-fit                                               | 1.132                                                            | 1.072                                                              |
| $\Delta\rho_{\max}$ , $\Delta\rho_{\min}$ (eÅ <sup>-3</sup> ) | +0.502, -0.703                                                   | +0.355, -0.336                                                     |
| CCDC                                                          | 2119314                                                          | 2119313                                                            |

## 9. References

- 1 Q. Yan, Y. C. Fang, Y. X. Jia and X. H. Duan, *New J. Chem.*, 2017, **41**, 2372.
- 2 V. Soni, R. A. Jagtap, R. G. Gonnade and B. Punji, *ACS Catal.*, 2016, **6**, 5666.
- 3 B. S. Kim, C. Jang, D. J. Lee and S. W. Youn, *Chem. Asian J.*, 2010, **5**, 2336.
- 4 J. Xu, C. Shen, X. Zhu, P. Zhang, M. J. Ajitha, K.-W. Huang, Z. An and X. Liu, *Chem. Asian J.*, 2016, **11**, 882.
- 5 S. Fu, N.-Y. Chen, X. Liu, Z. Shao, S.-P. Luo and Q. Liu, *J. Am. Chem. Soc.*, 2016, **138**, 8588.
- 6 V. G. Landge, J. Pitchaimani, S. P. Midya, M. Subaramanian, V. Madhu and E. Balaraman, *Catal. Sci. Technol.*, 2018, **8**, 428.
- 7 K. Semba, T. Fujihara, T. Xu, J. Terao and Y. Tsuji, *Adv. Syn. Catal.*, 2012, **354**, 1542.
- 8 B. Xiao, Z. Niu, Y.-G. Wang, W. Jia, J. Shang, L. Zhang, D. Wang, Y. Fu, J. Zeng, W. He, K. Wu, J. Li, J. Yang, L. Liu and Y. Li, *J Am. Chem. Soc.*, 2015, **137**, 3791.
- 9 S. Enthaler, M. Haberberger and E. Irran, *Chem. Asian J.*, 2011, **6**, 1613.
- 10 Bruker, *APEX3, SAINT and SADABS. Bruker AXS Inc., Madison, Wisconsin, USA.* 2016.
- 11 G. M. Sheldrick, *Acta Crystallogr.*, 2008, **A64**, 112.
- 12 G. M. Sheldrick, *Acta Crystallogr.*, 2015, **C71**, 3.
- 13 L. J. Farrugia, *J. Appl. Crystallogr.*, 2012, **45**, 849.



## 10. NMR Spectra of Z-Alkenes

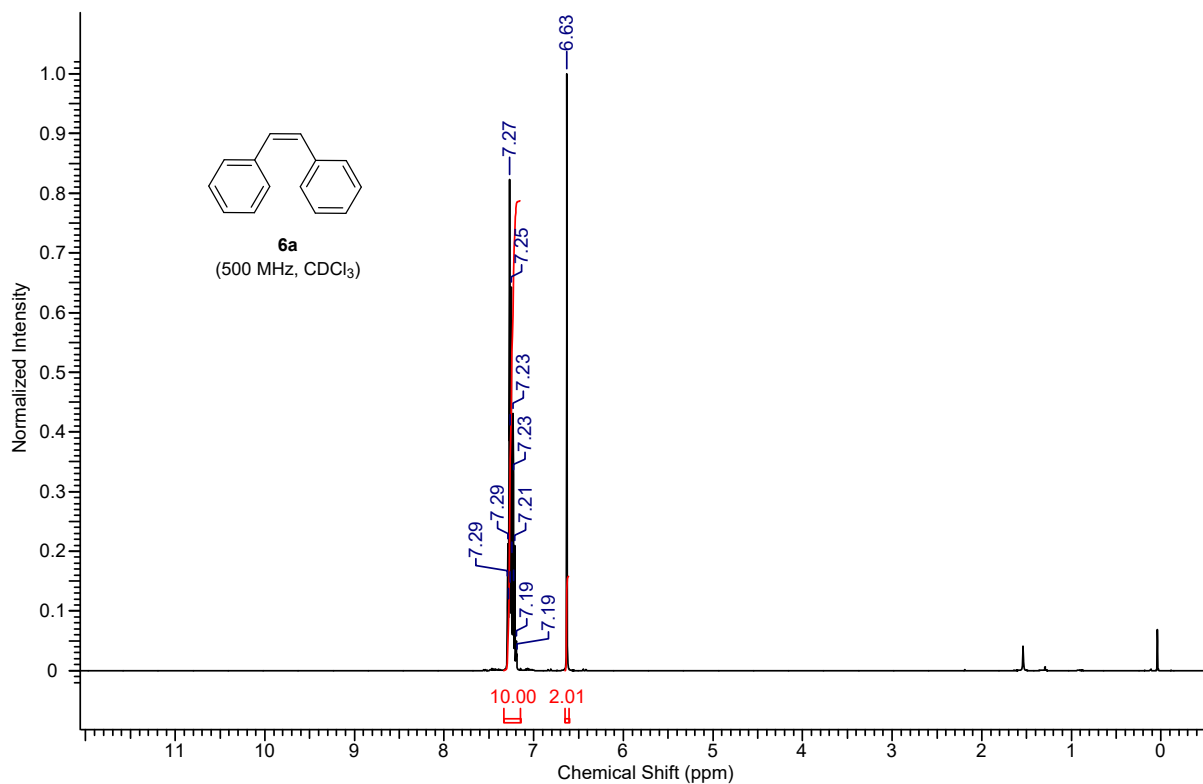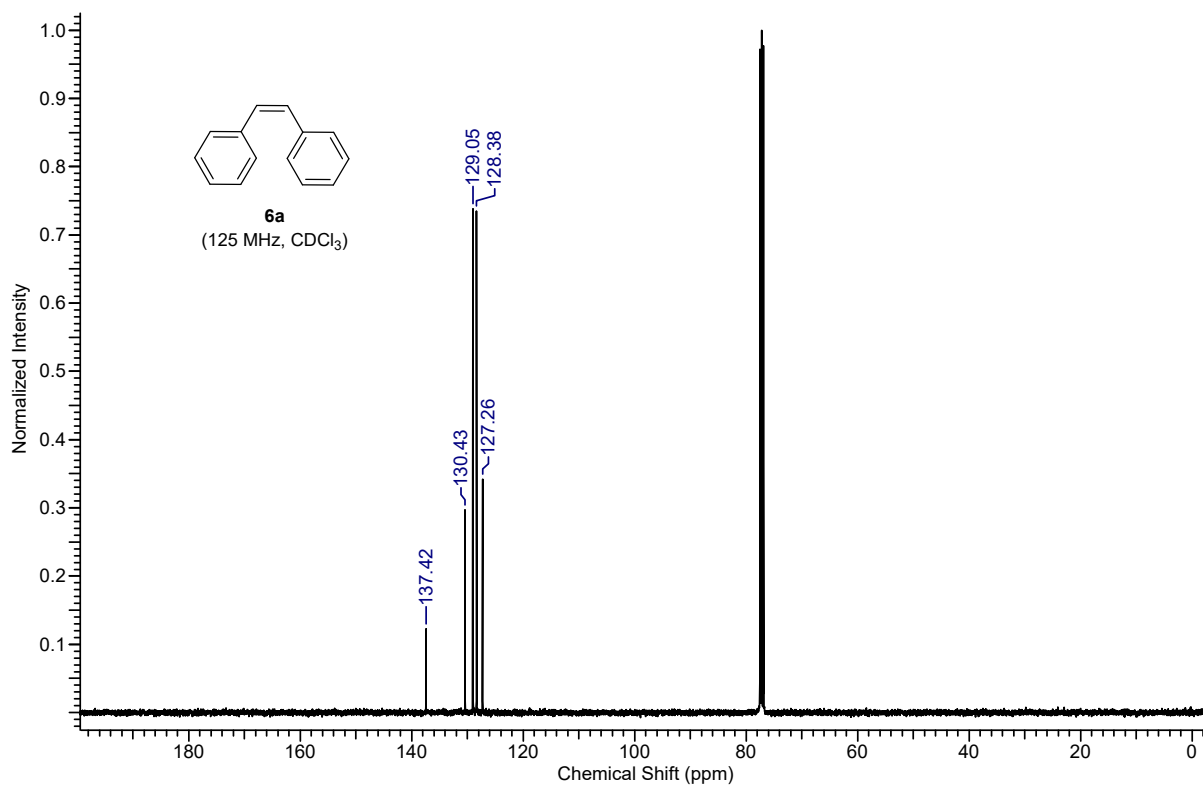

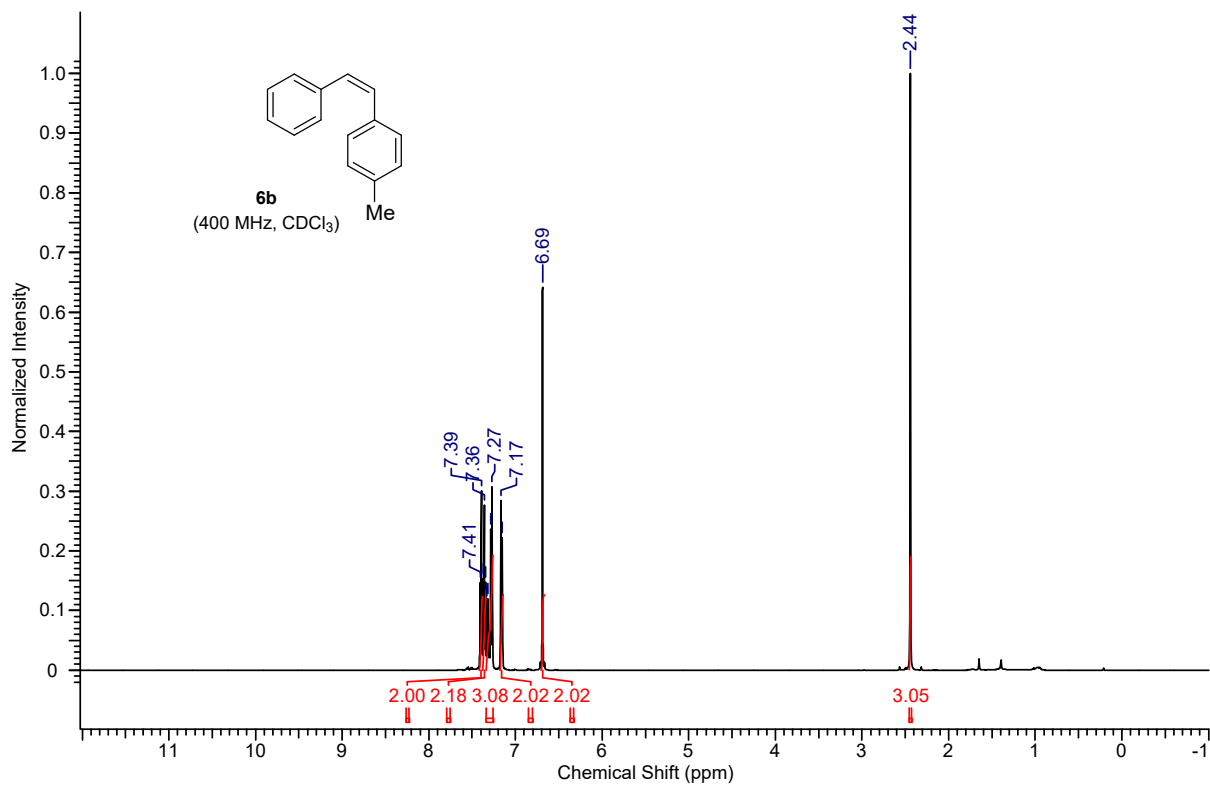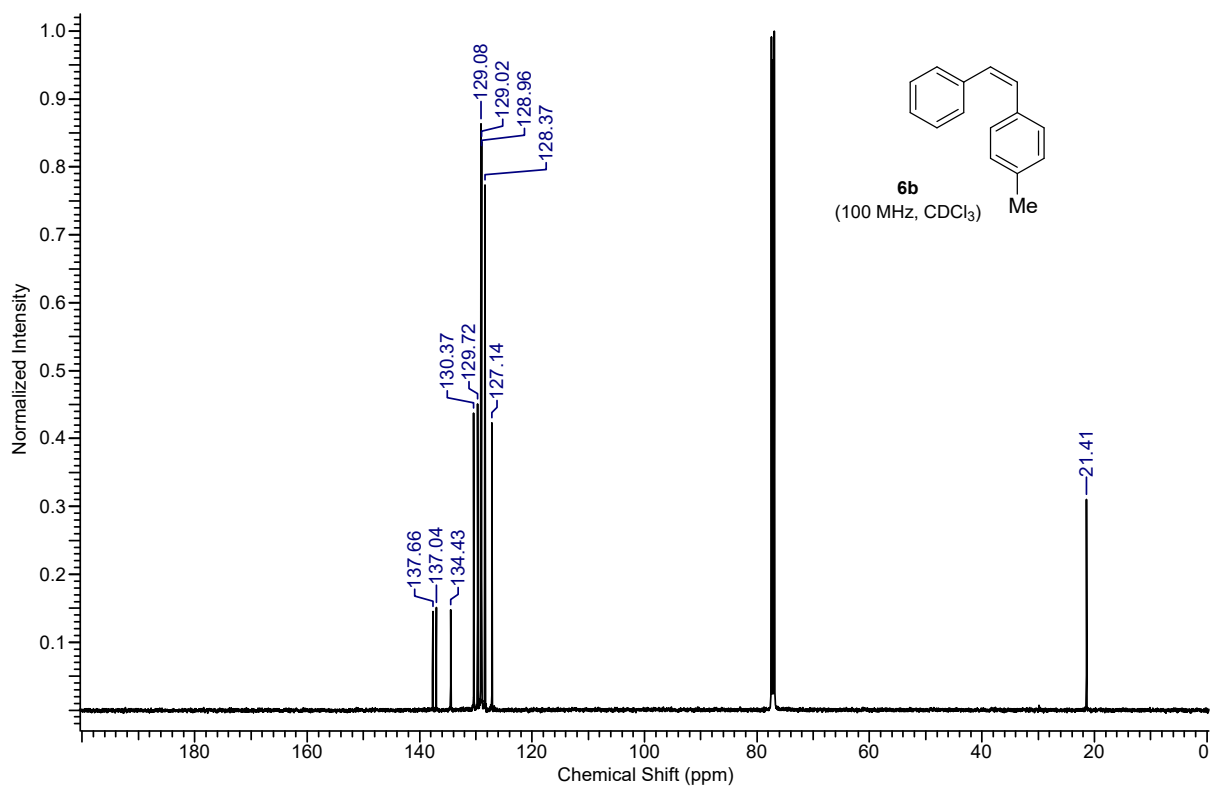

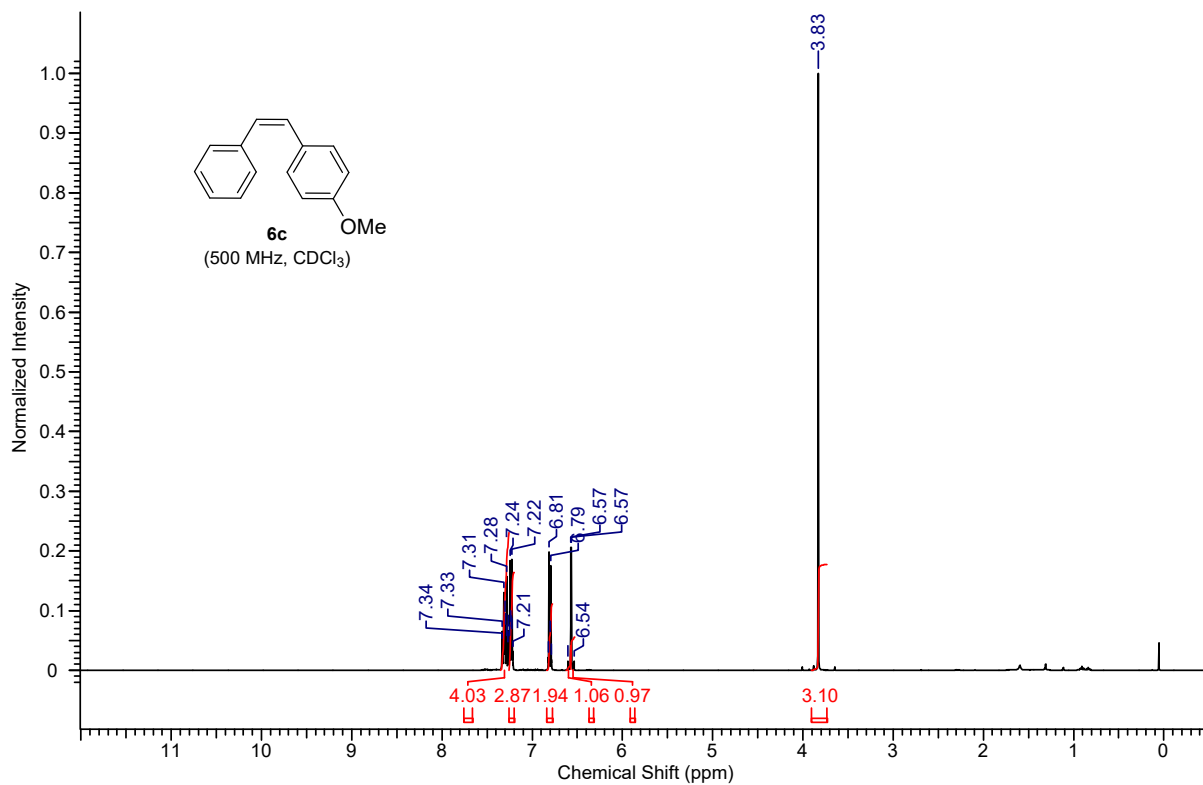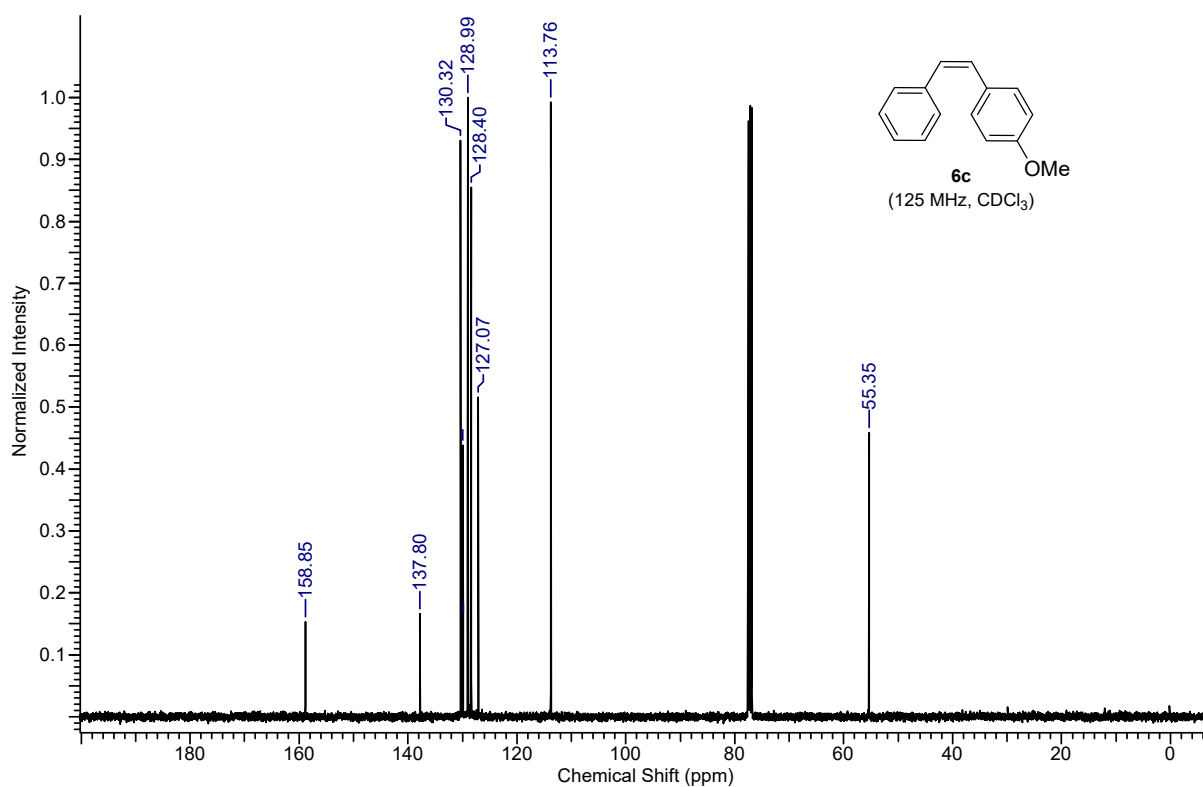

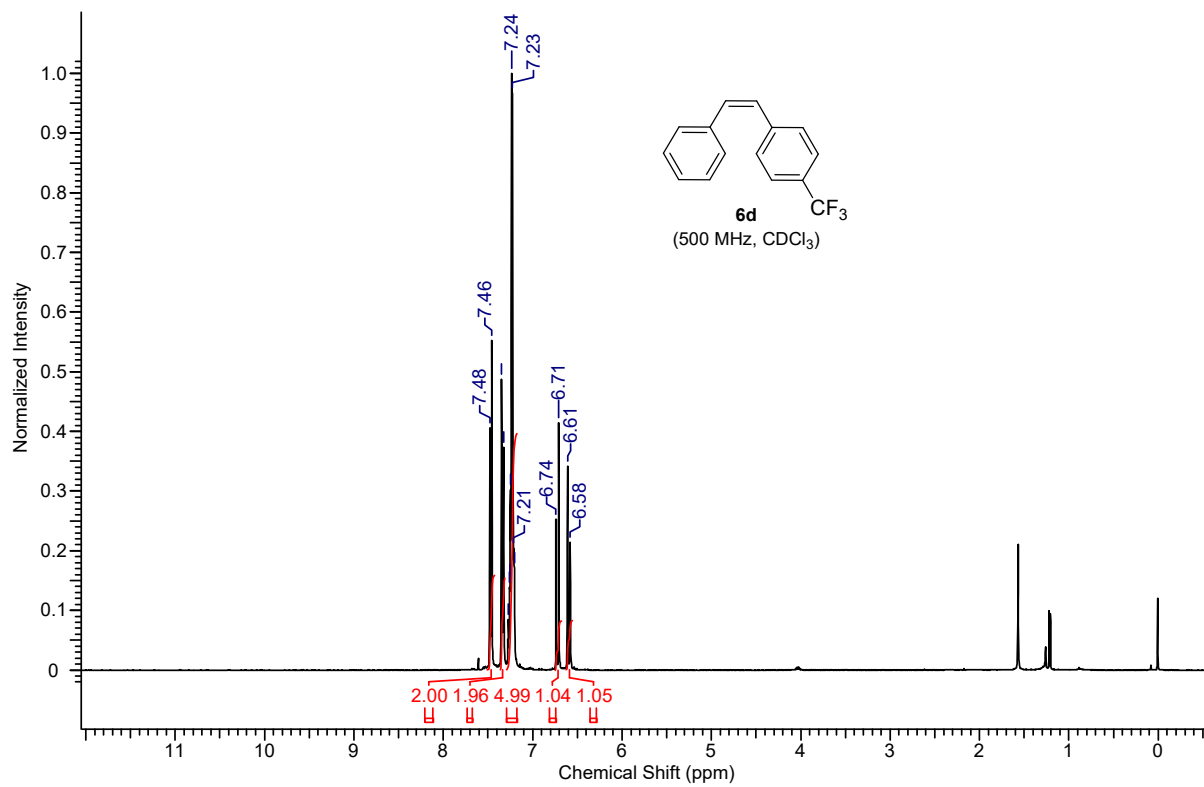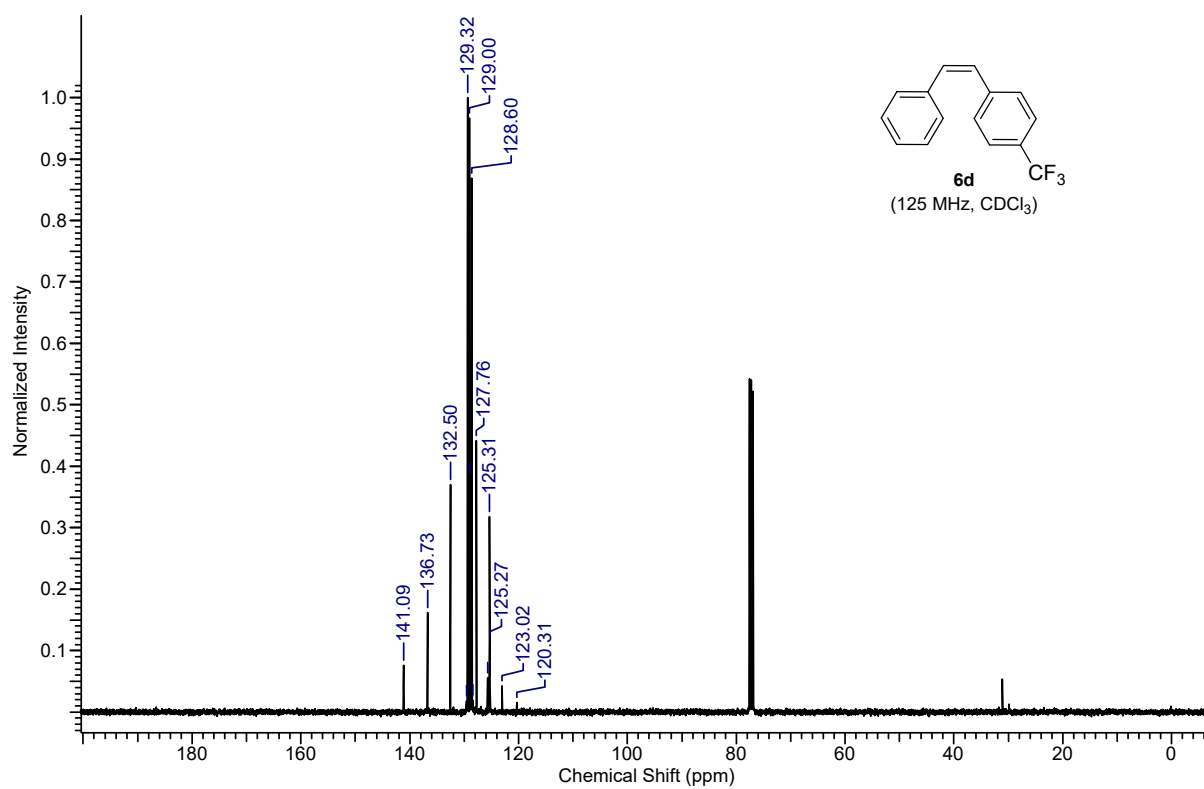

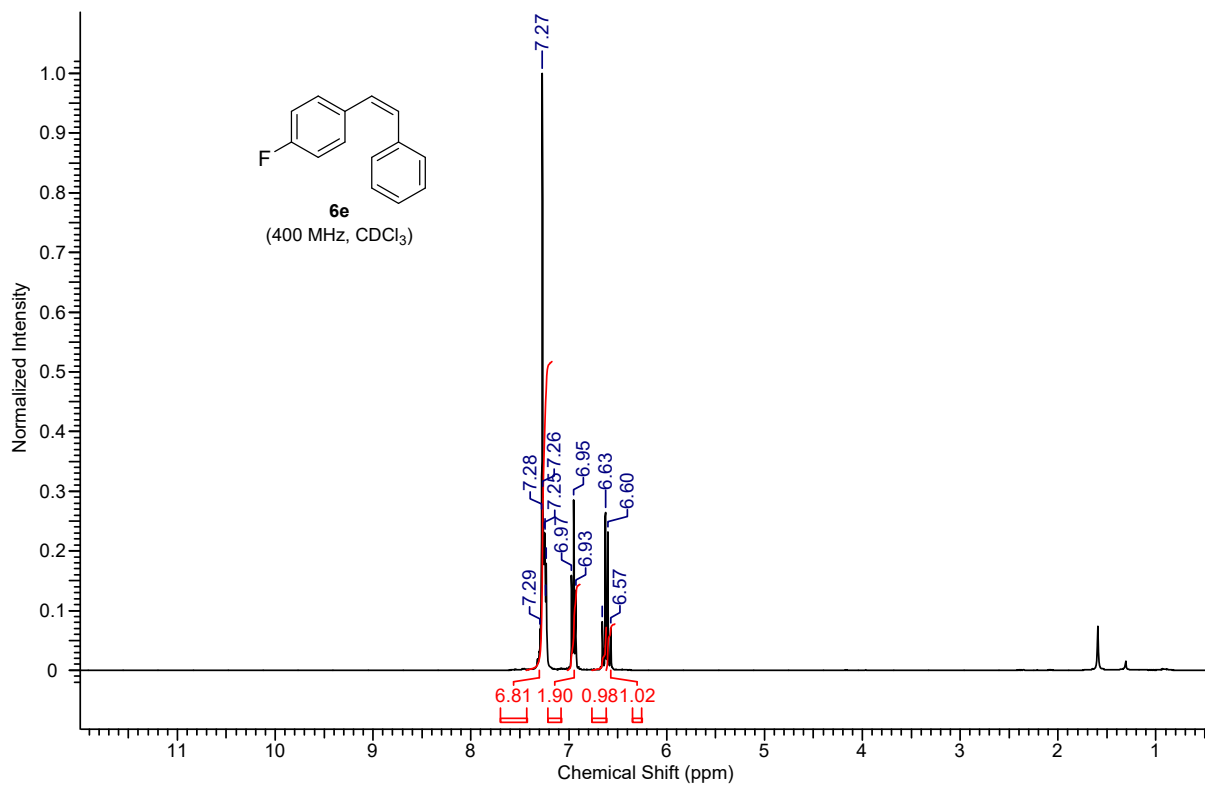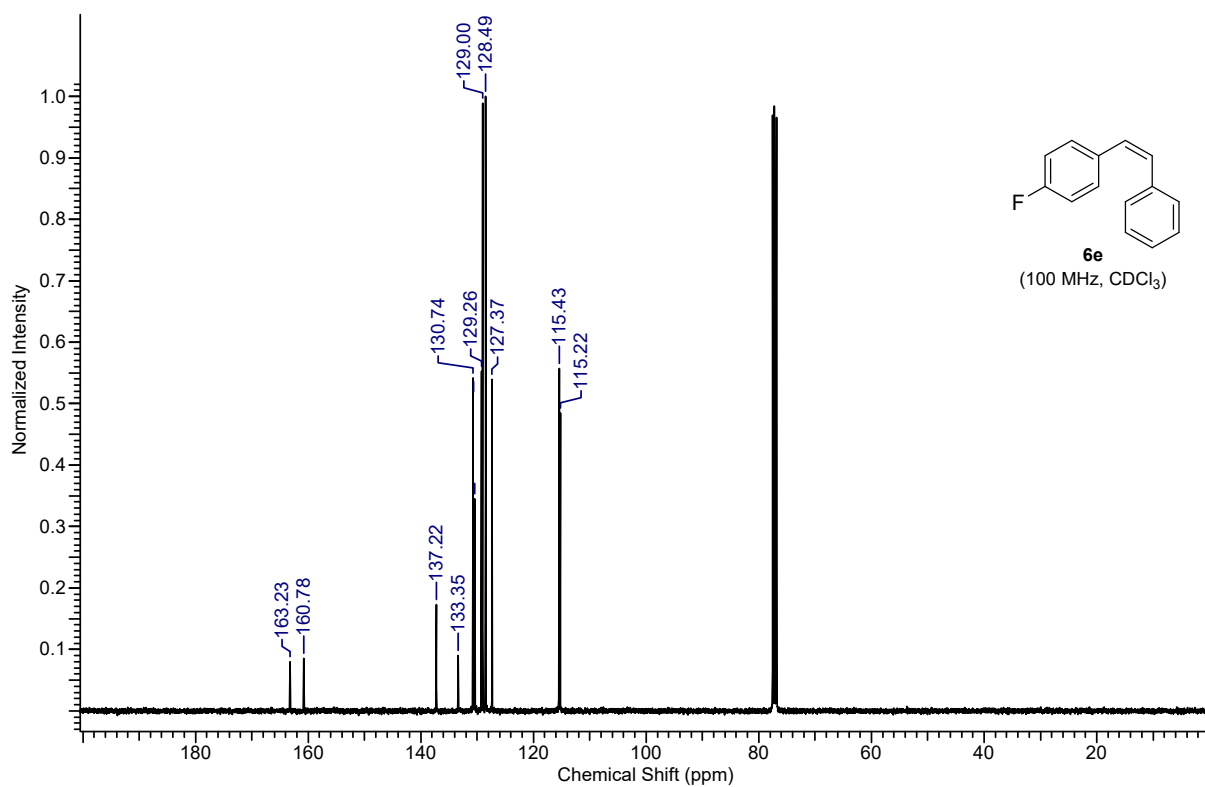

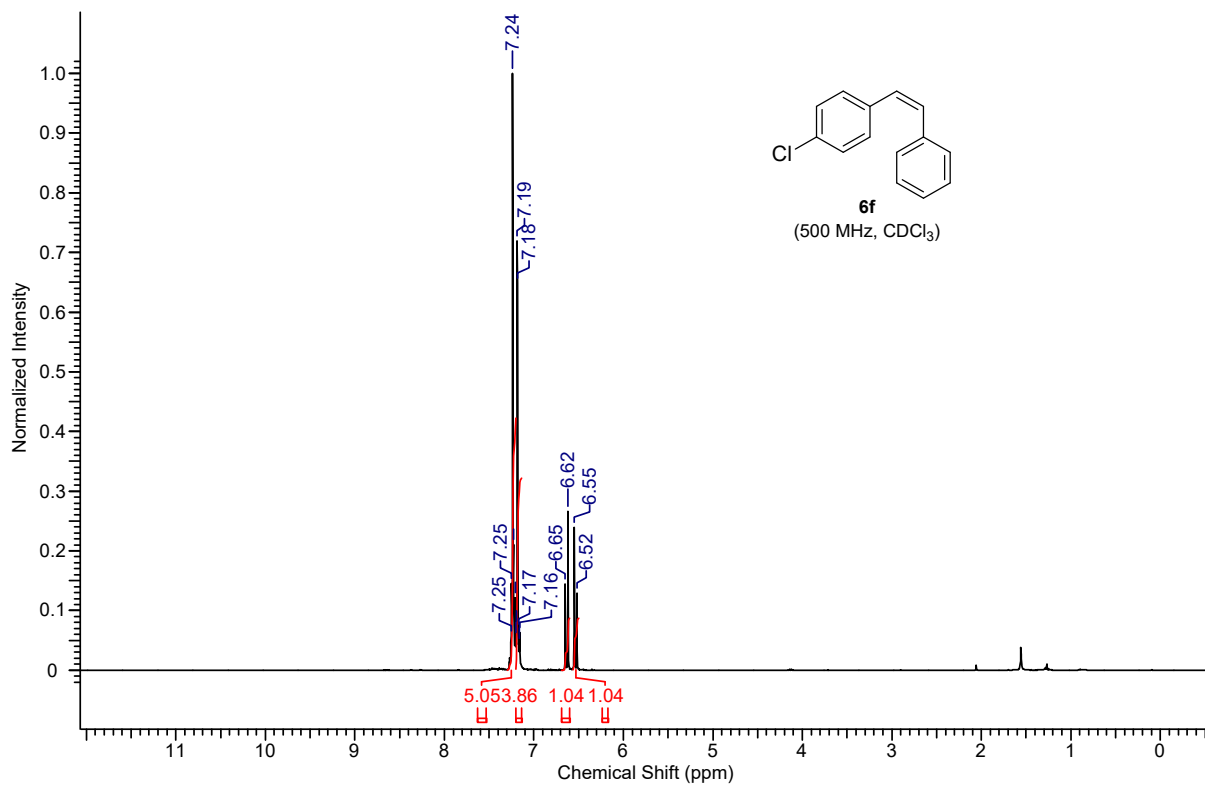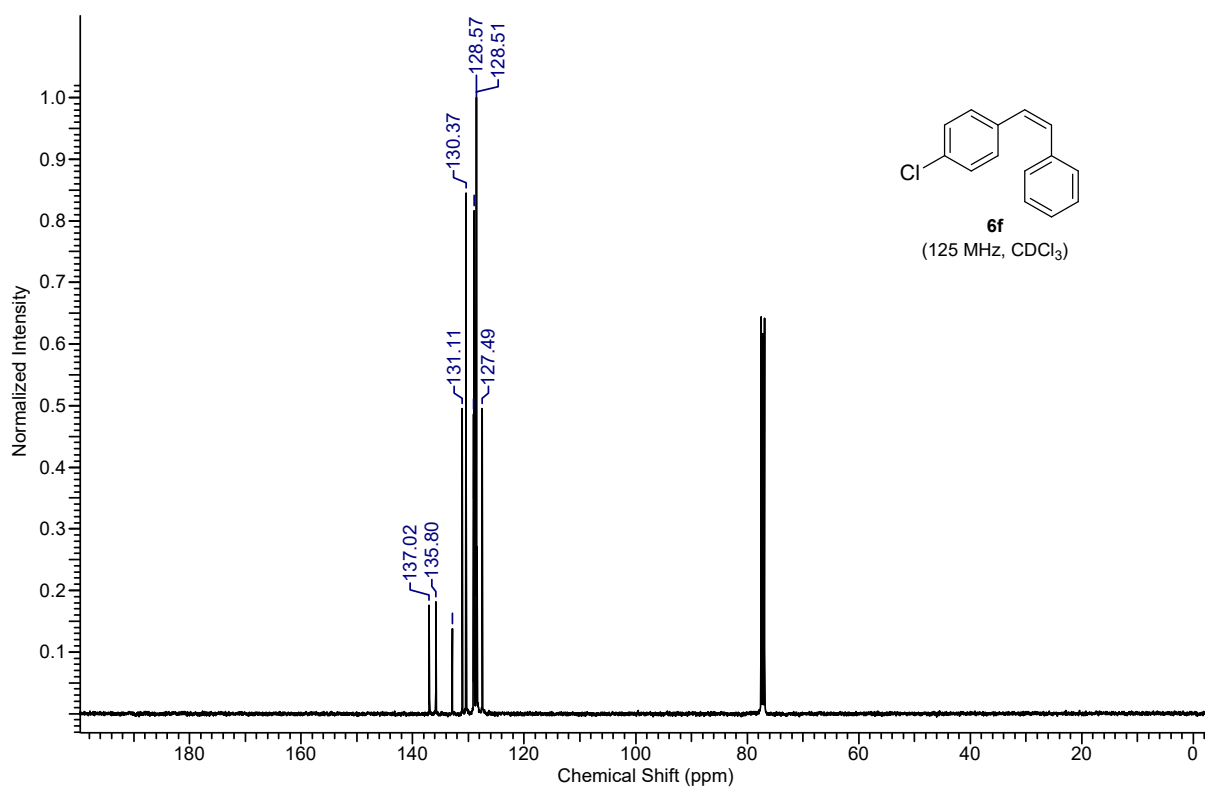

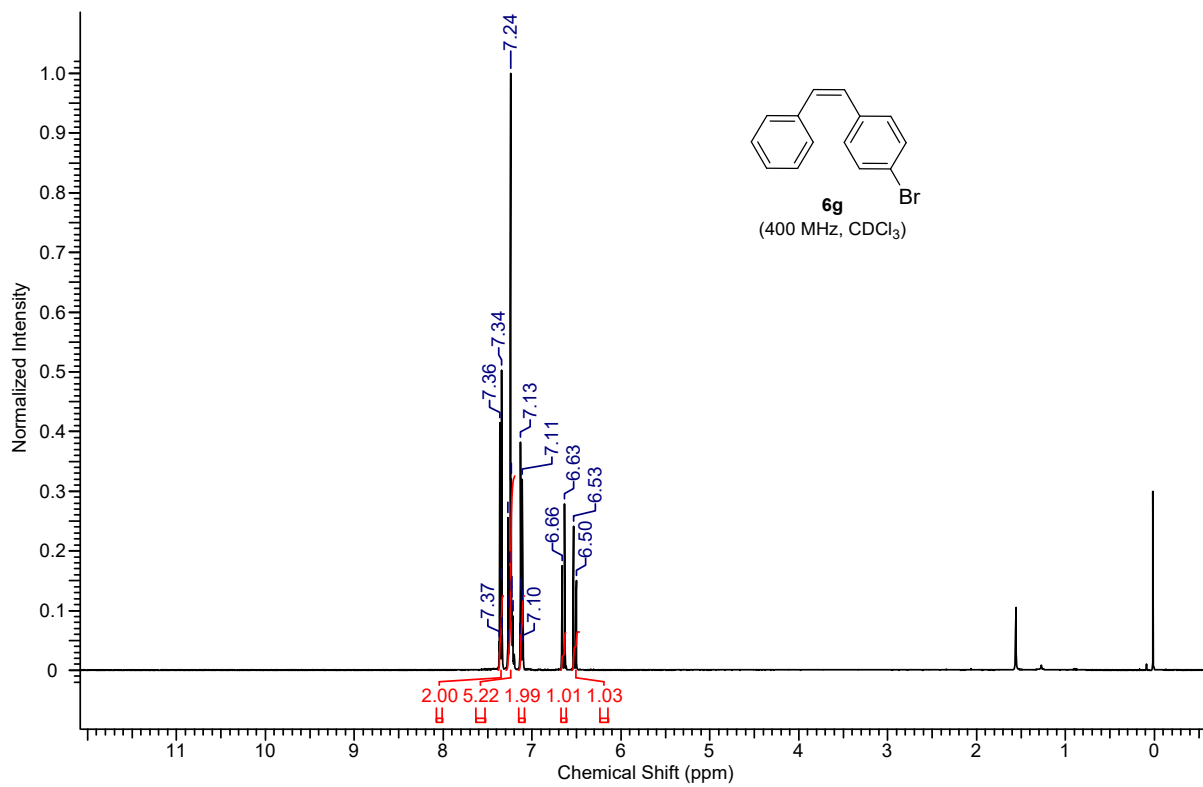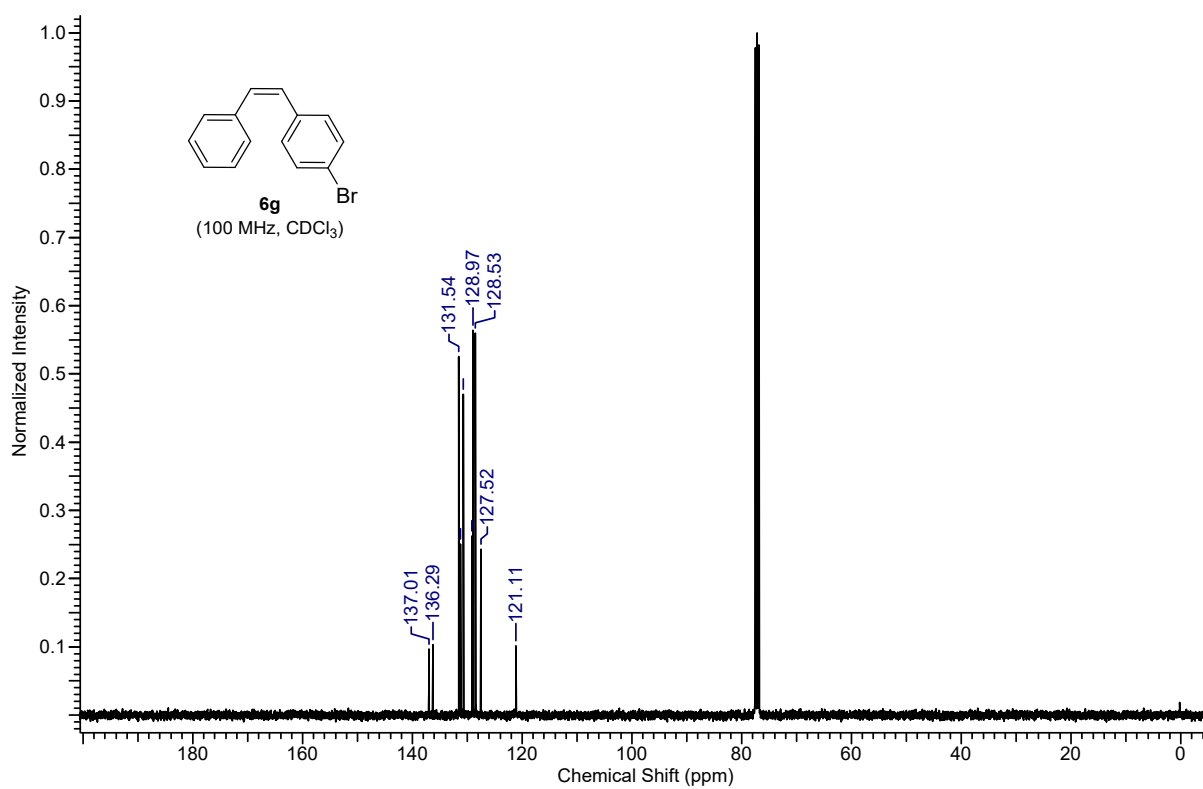

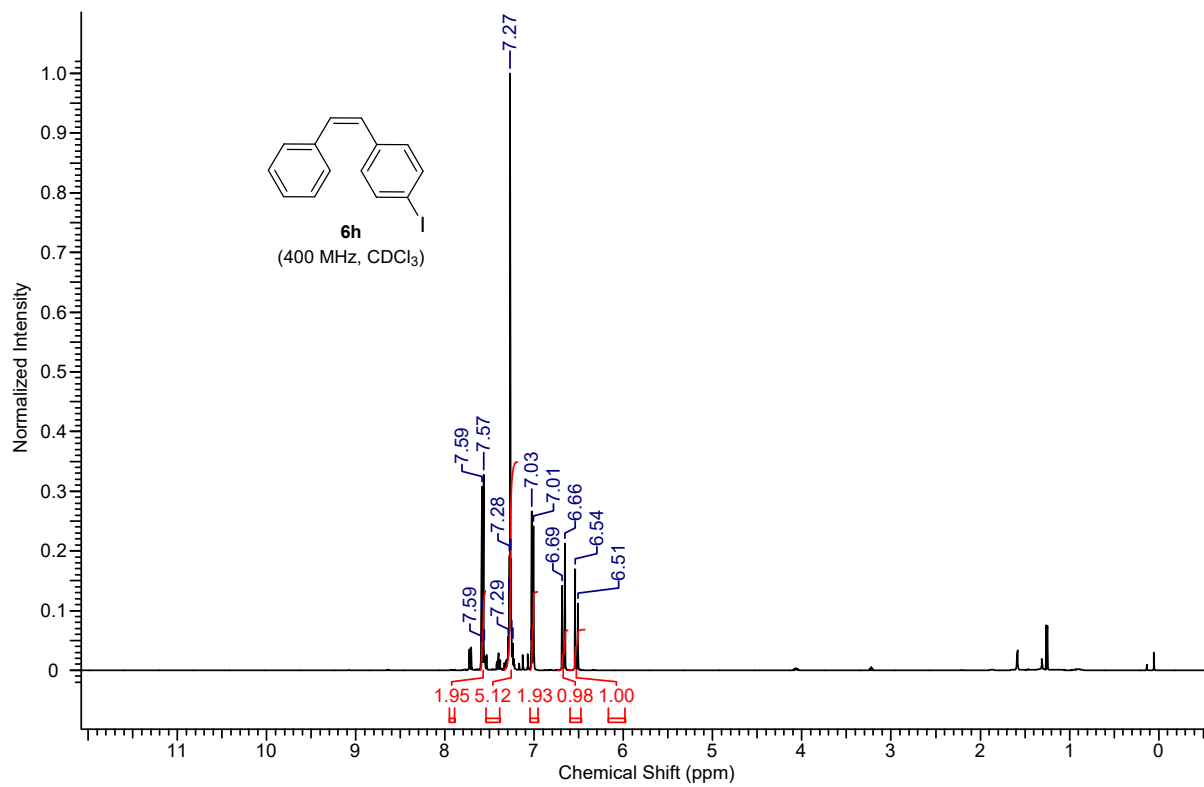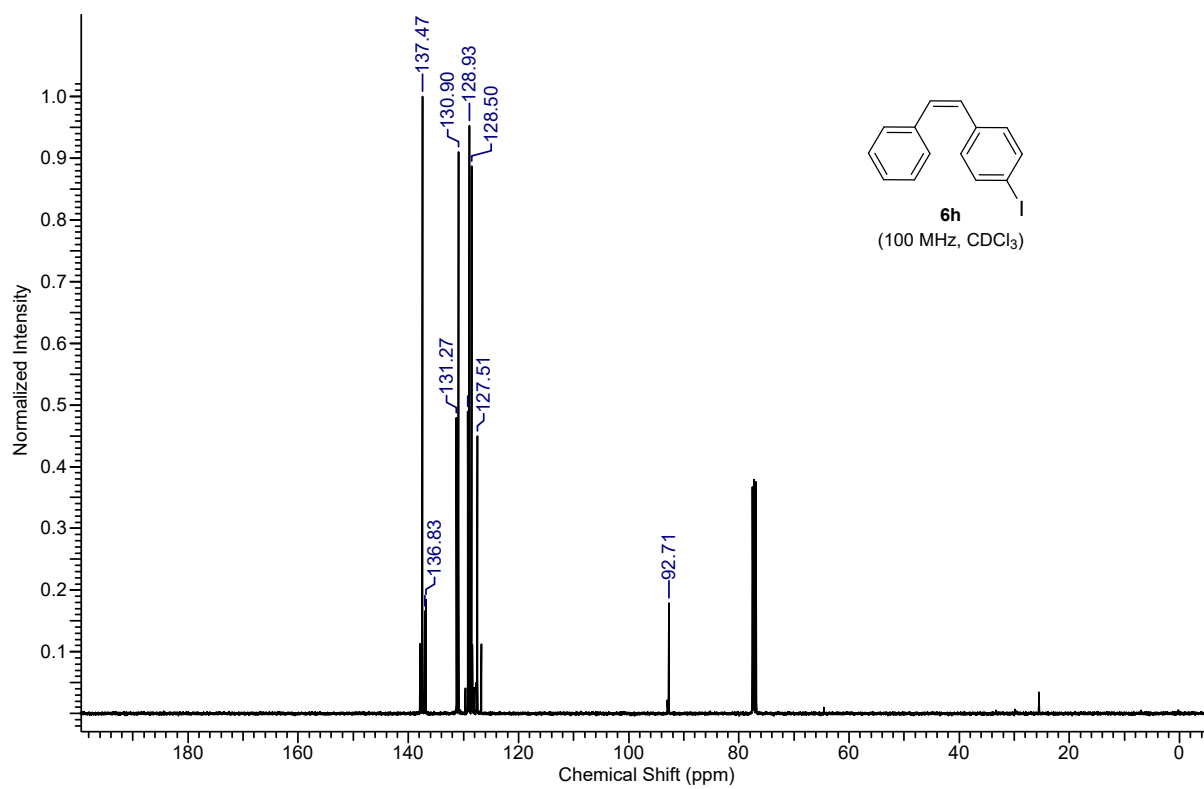



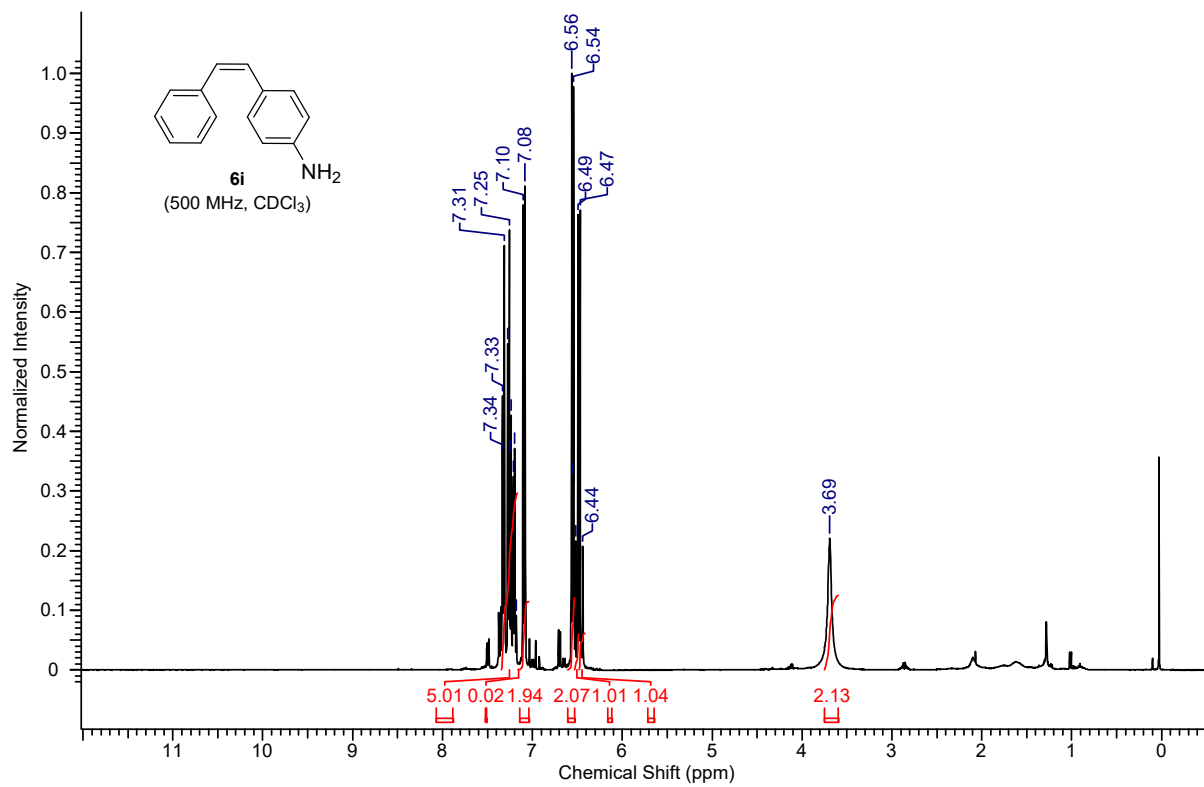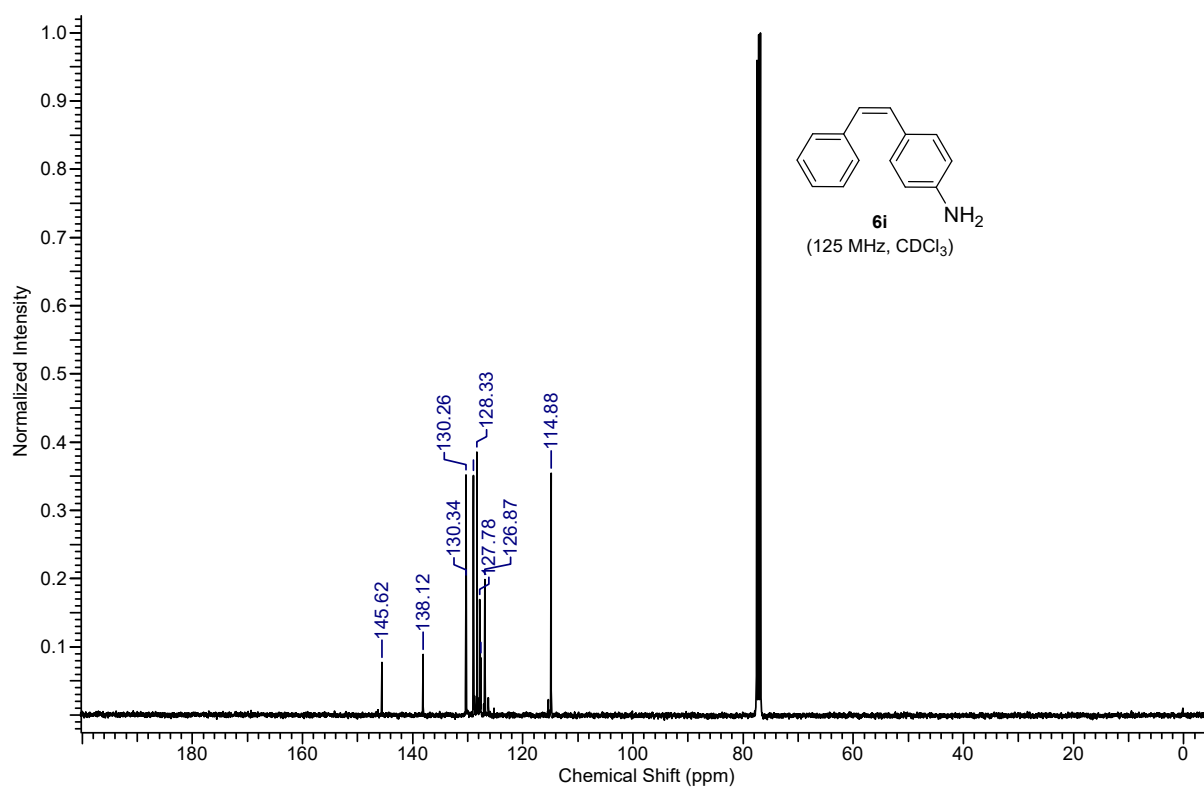

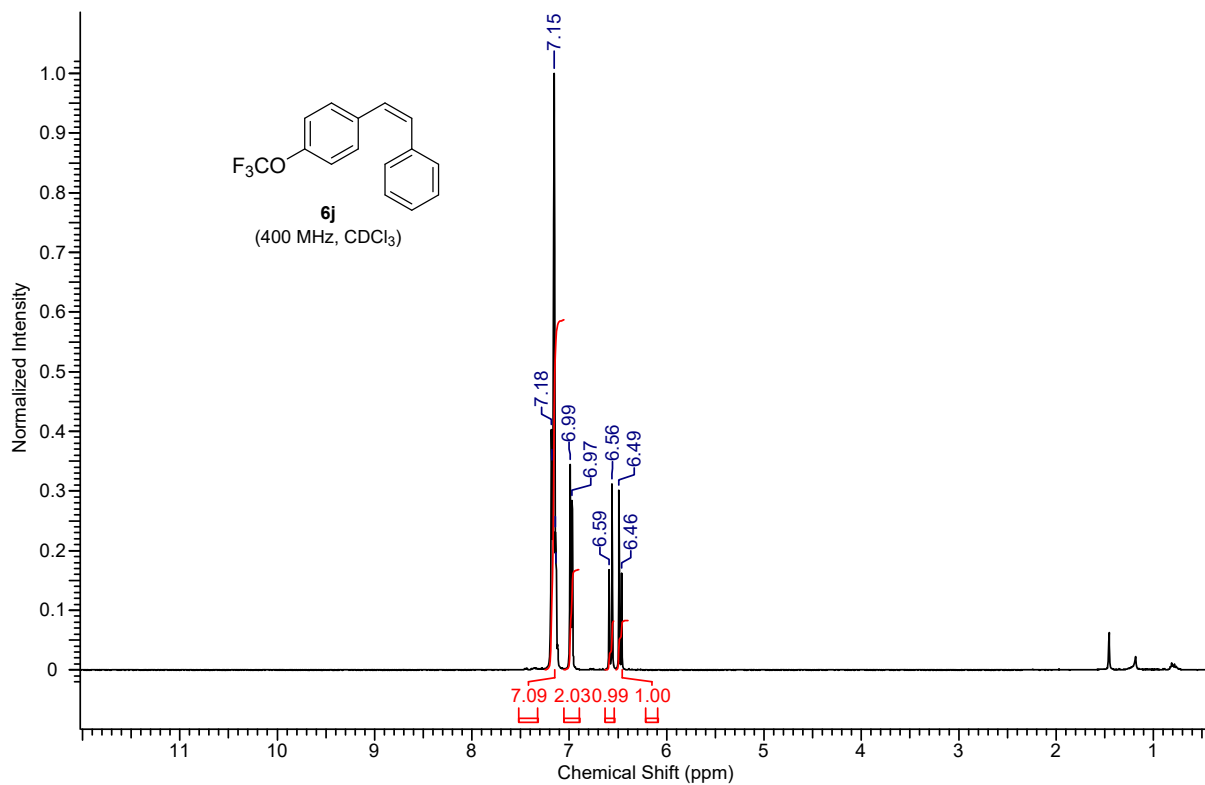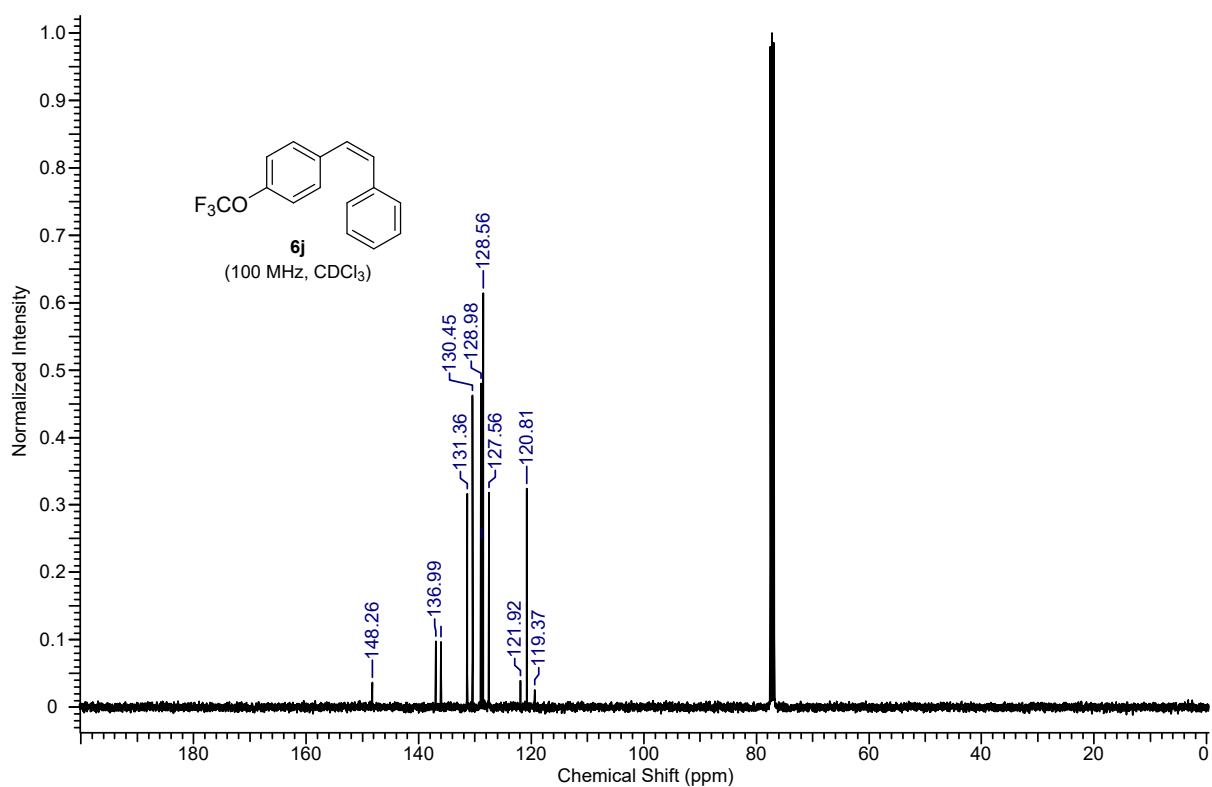

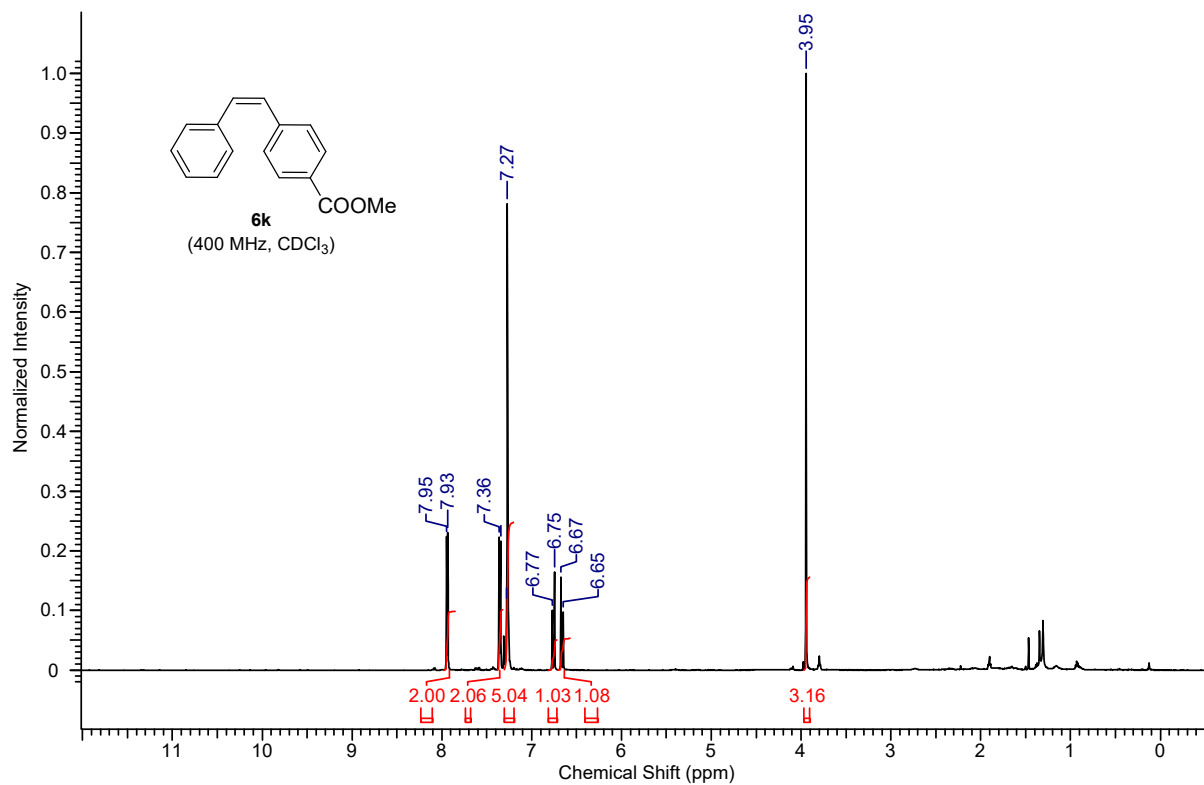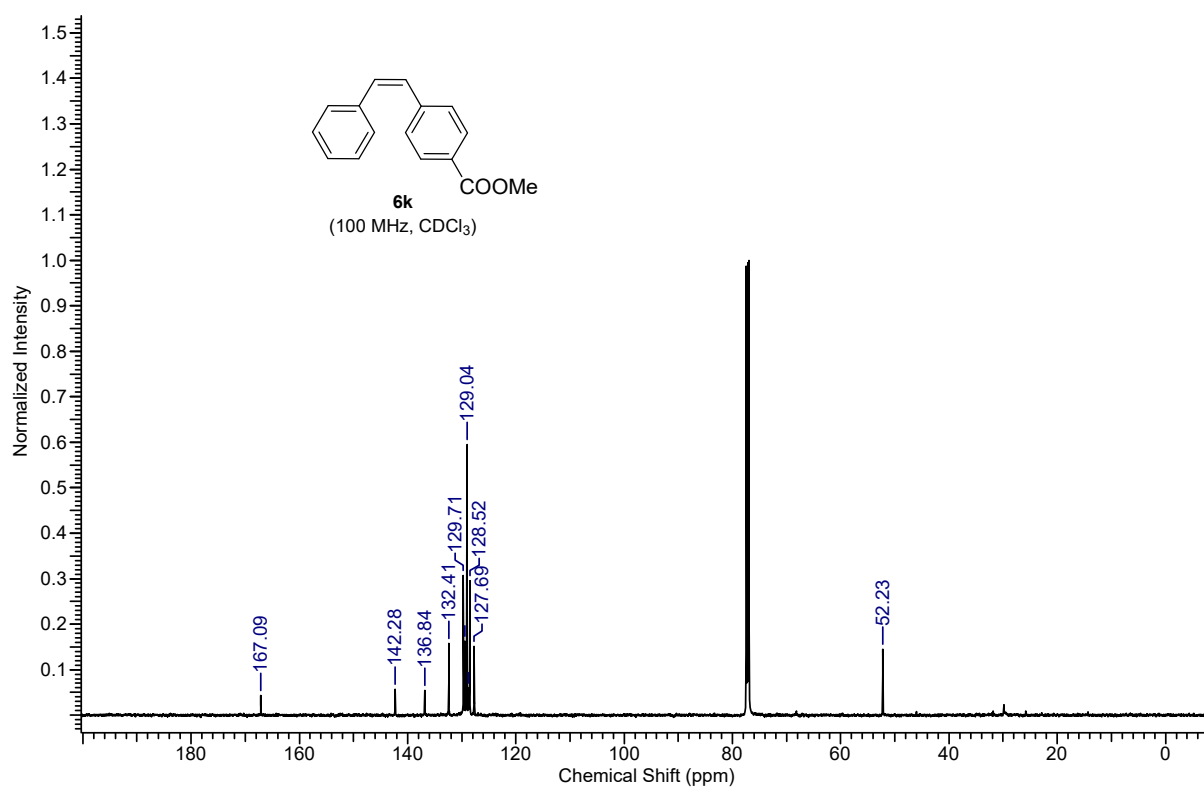

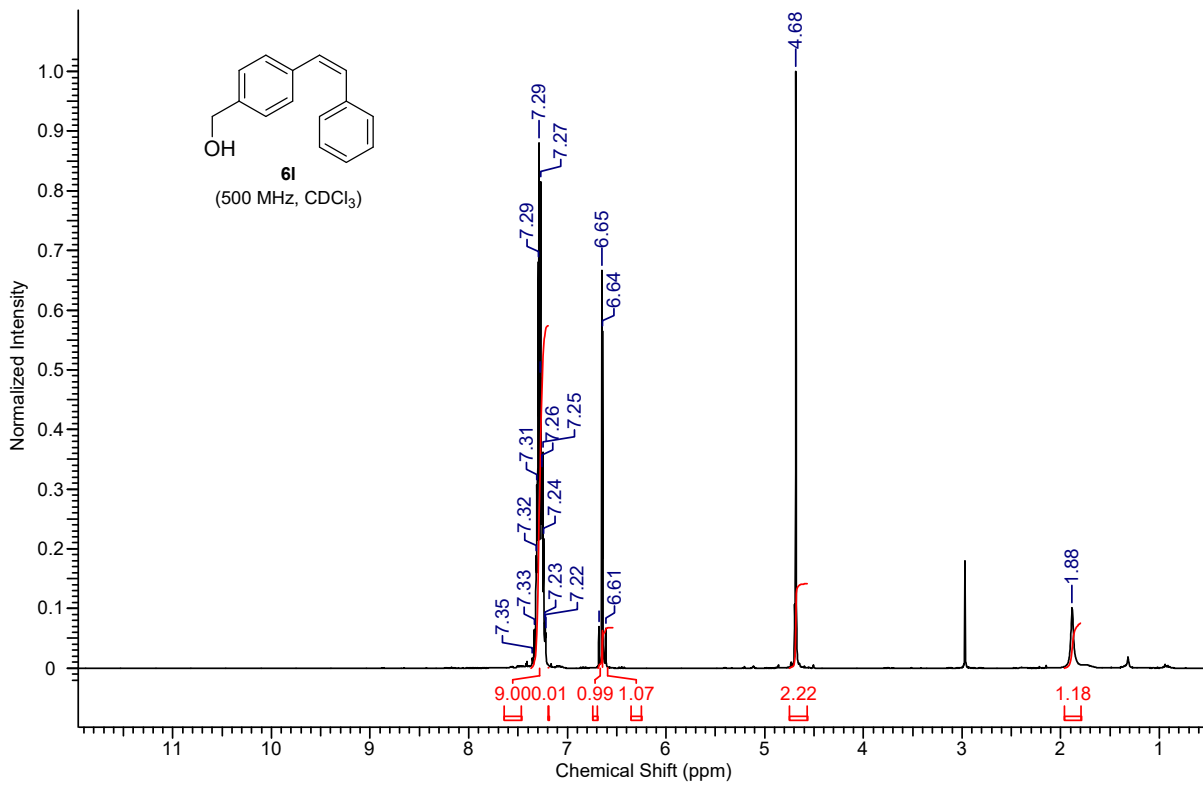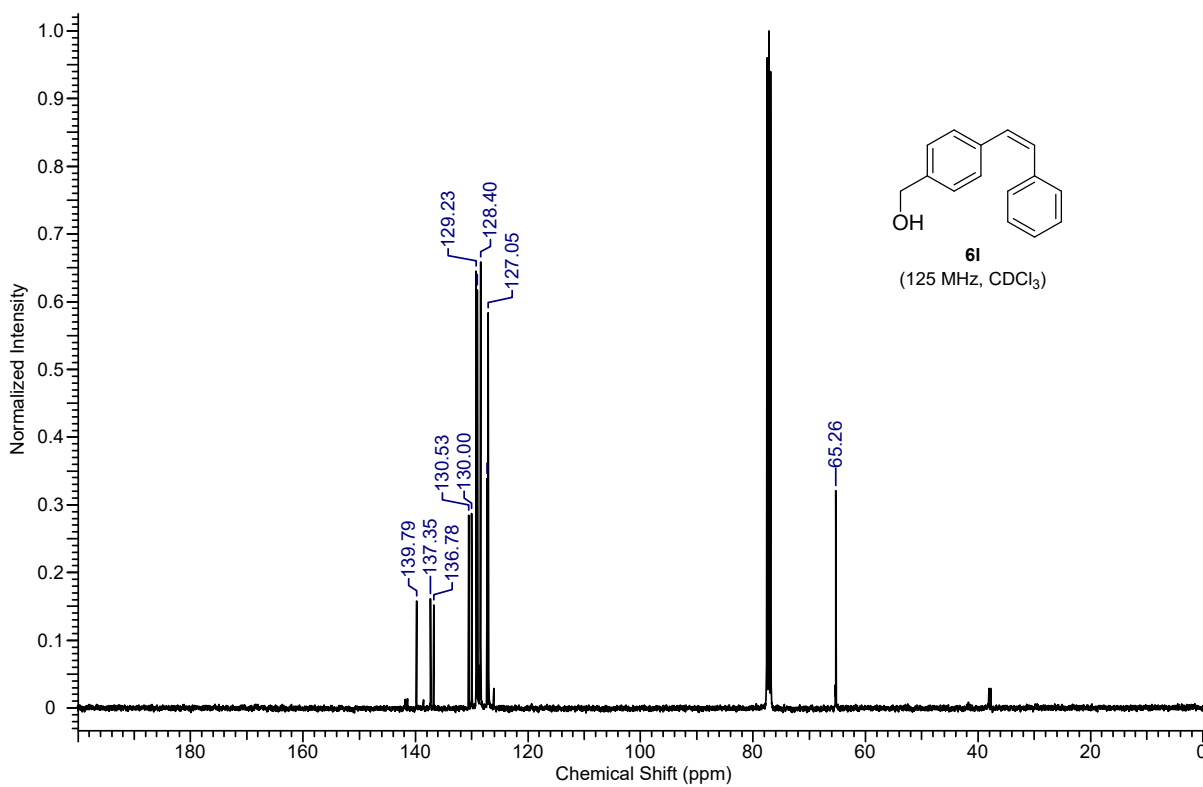

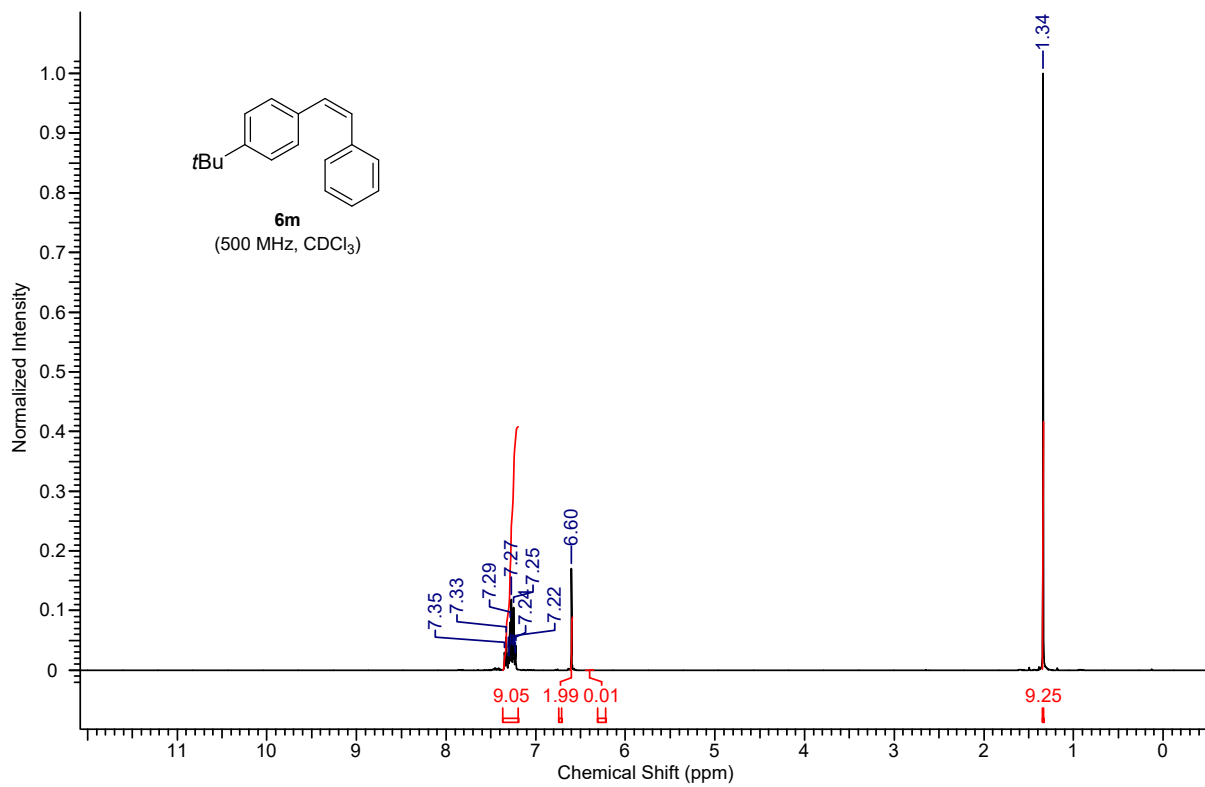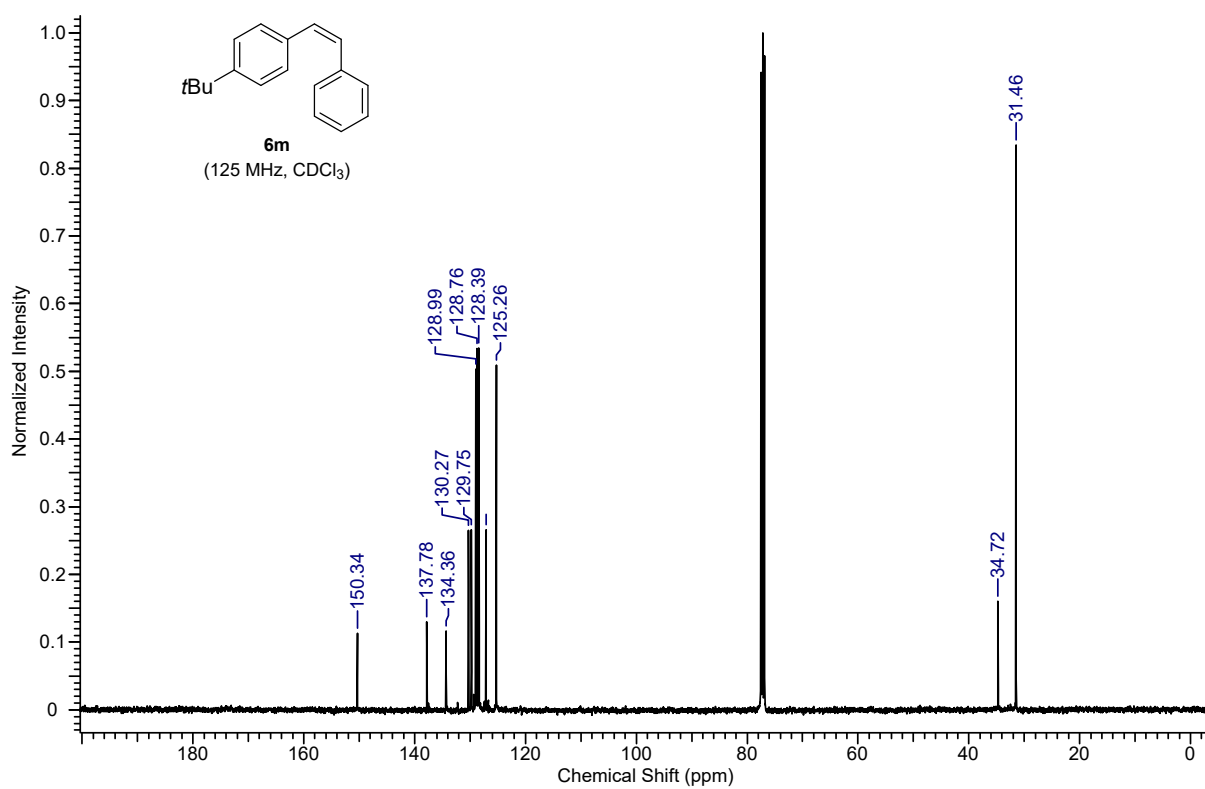

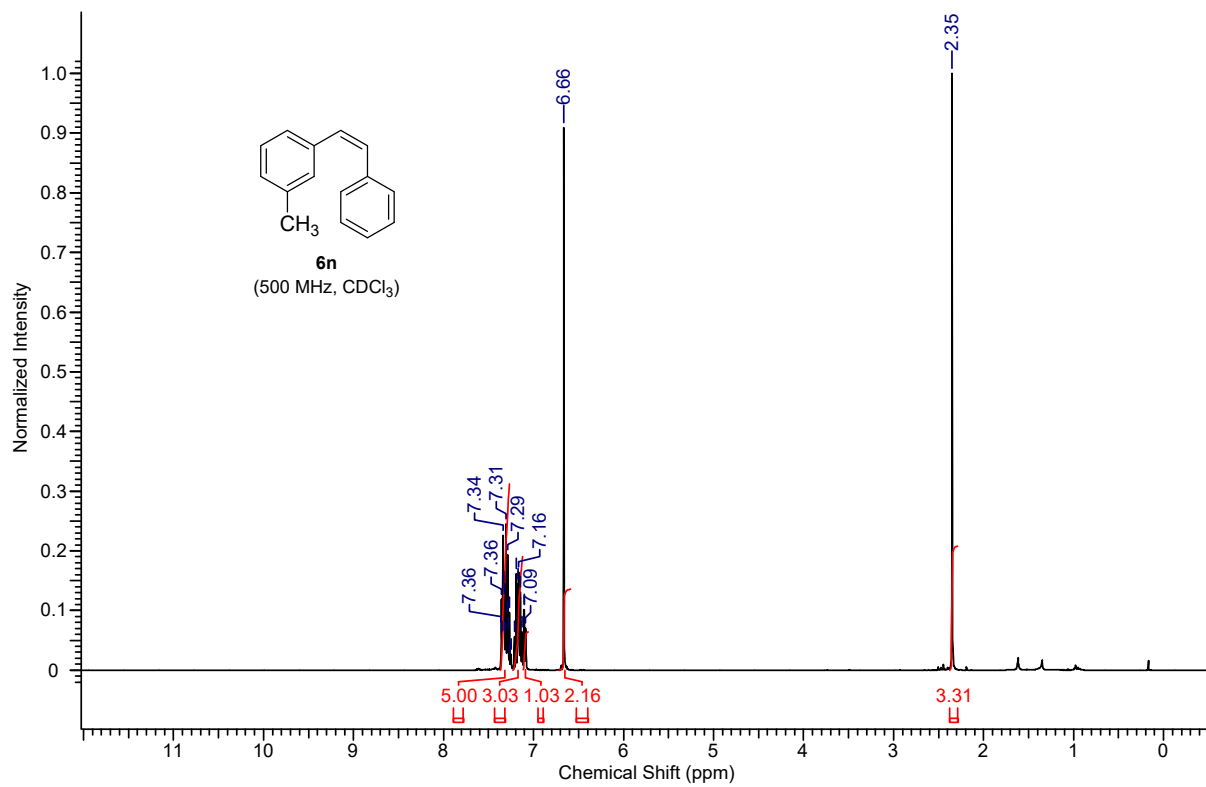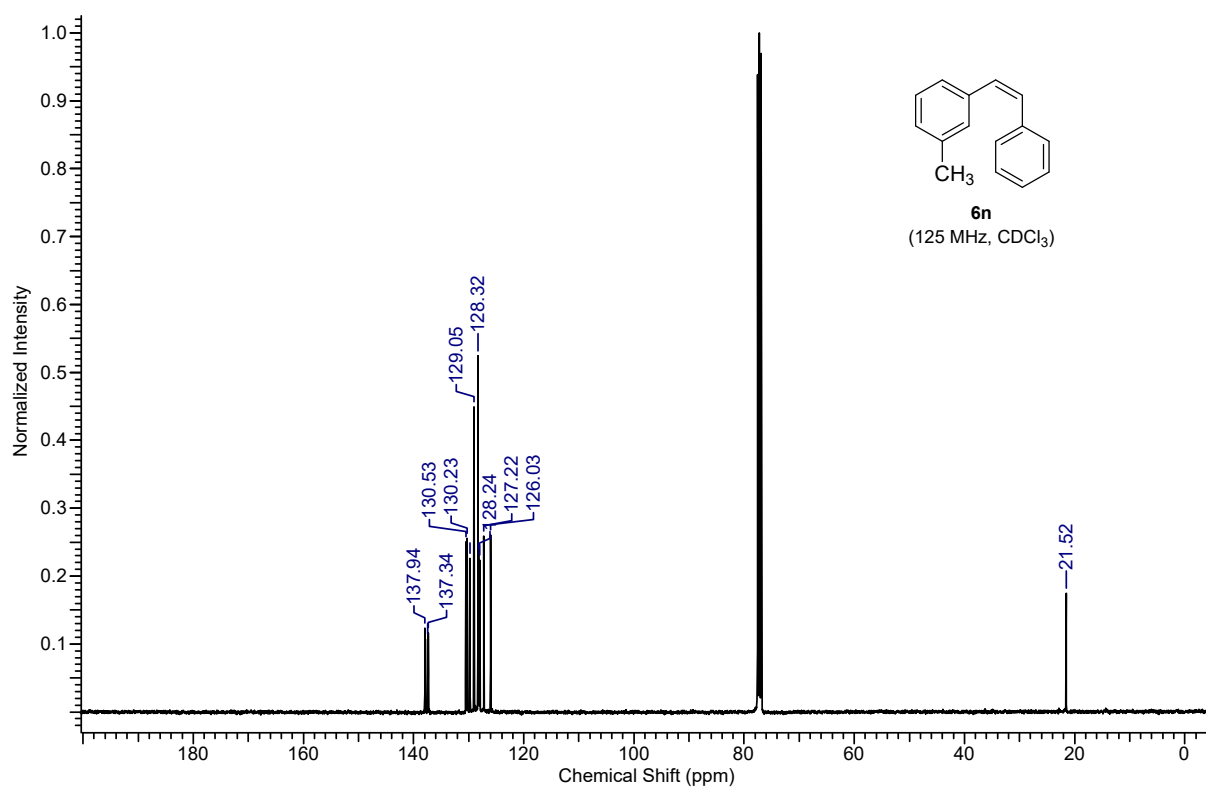

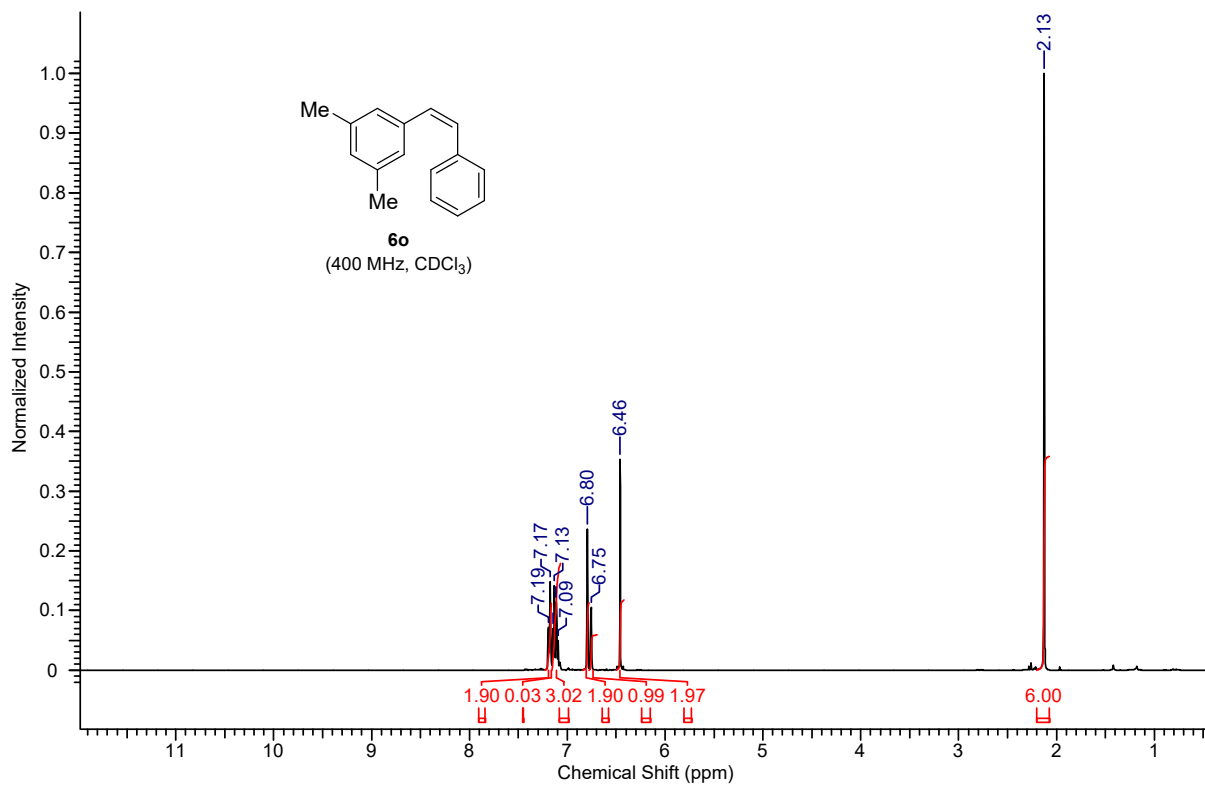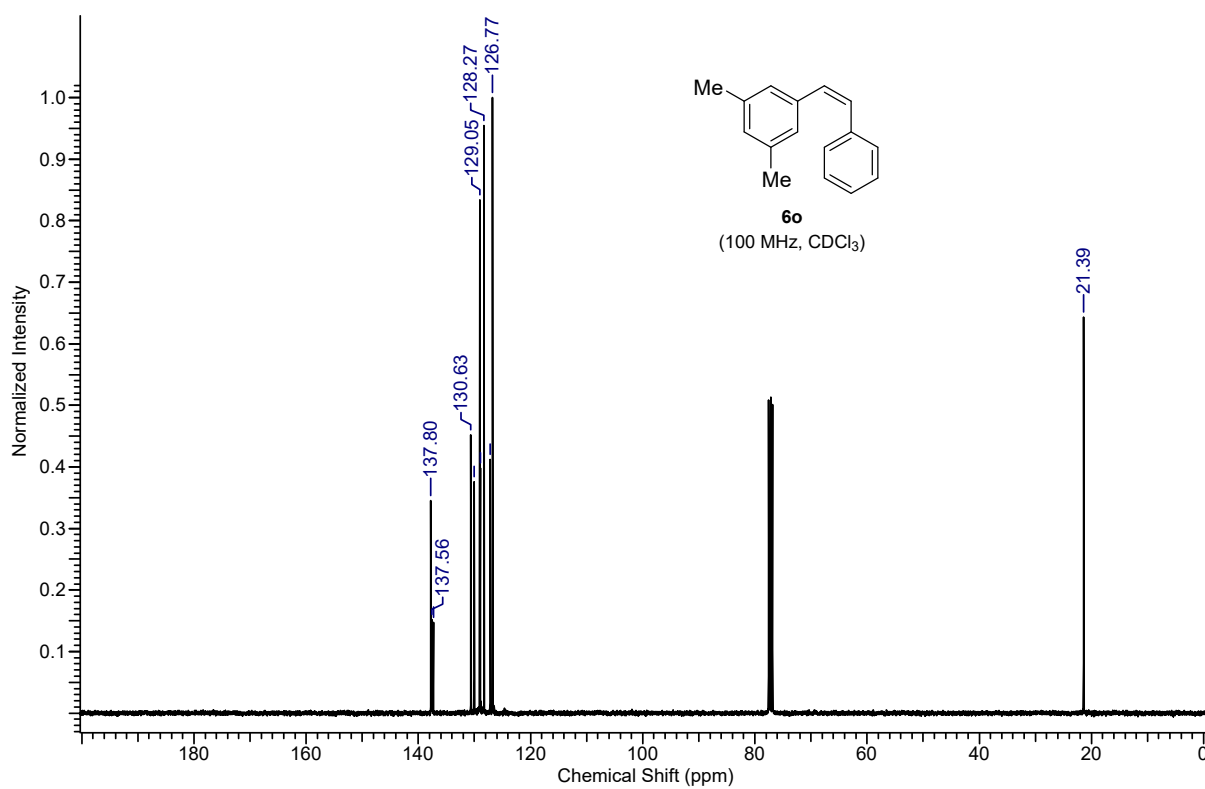

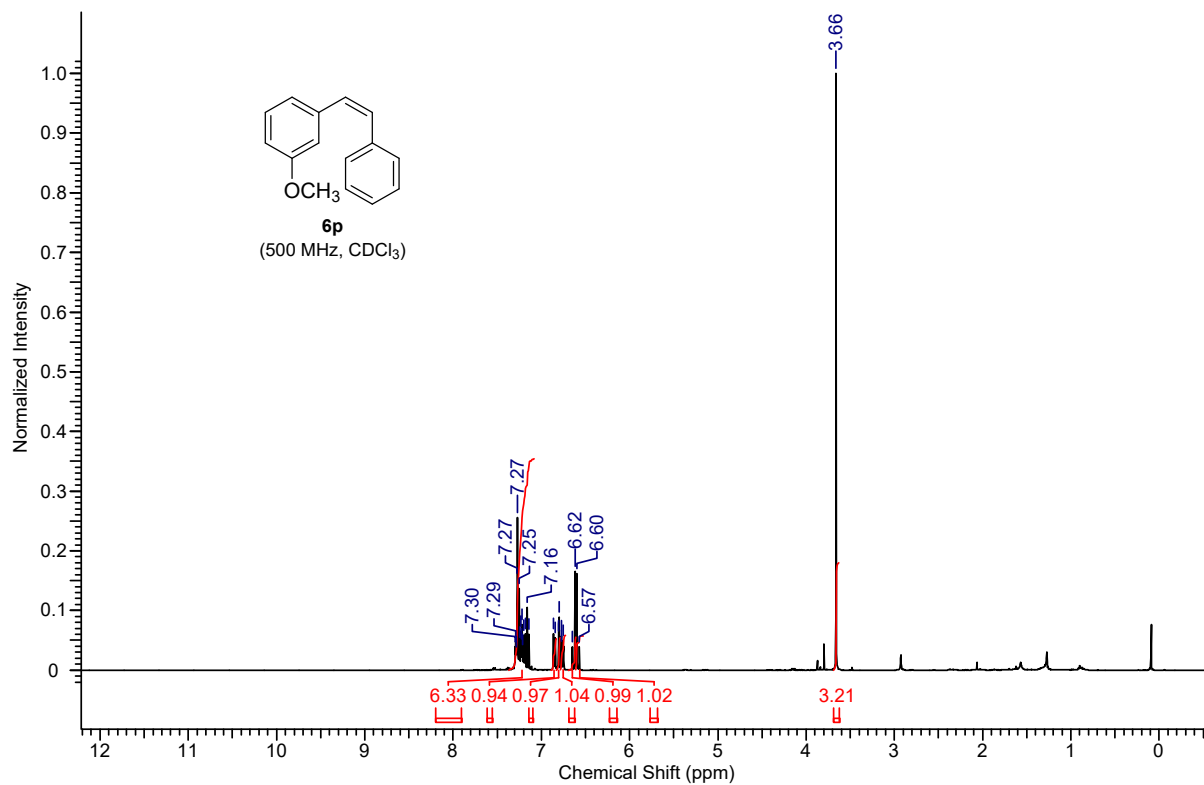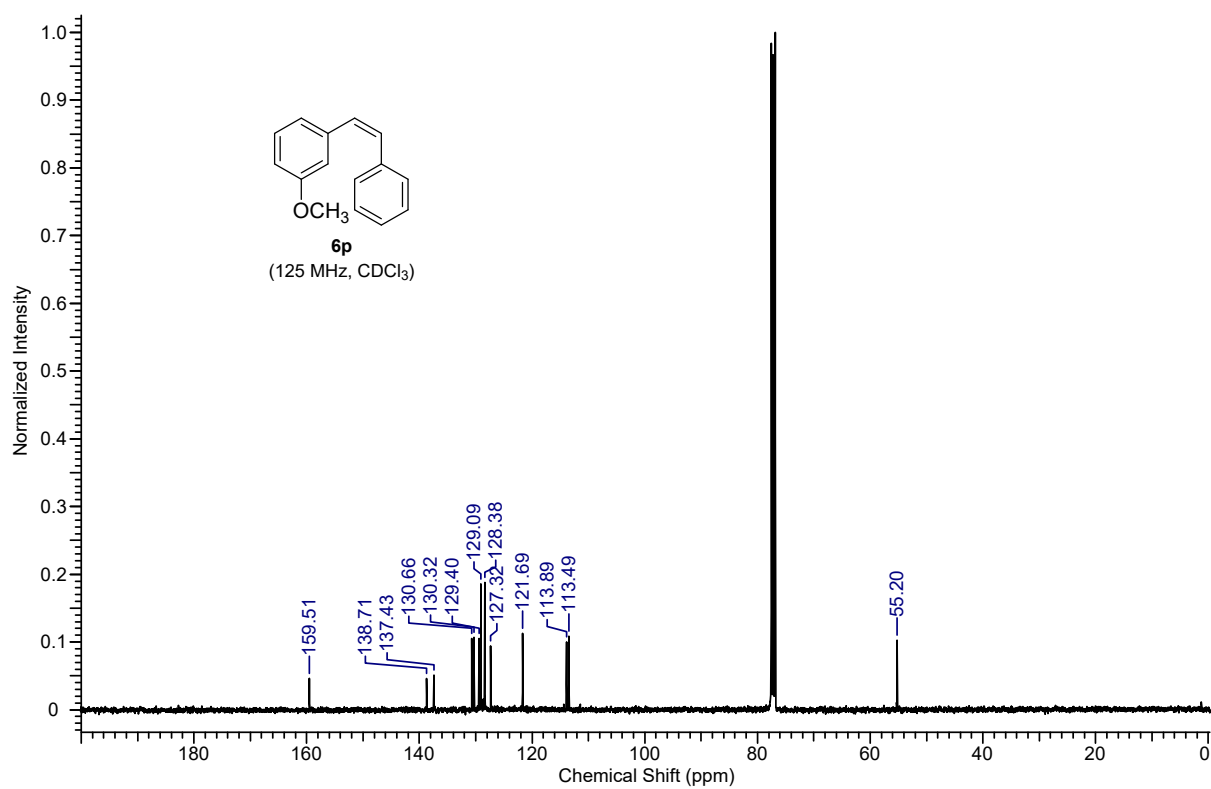



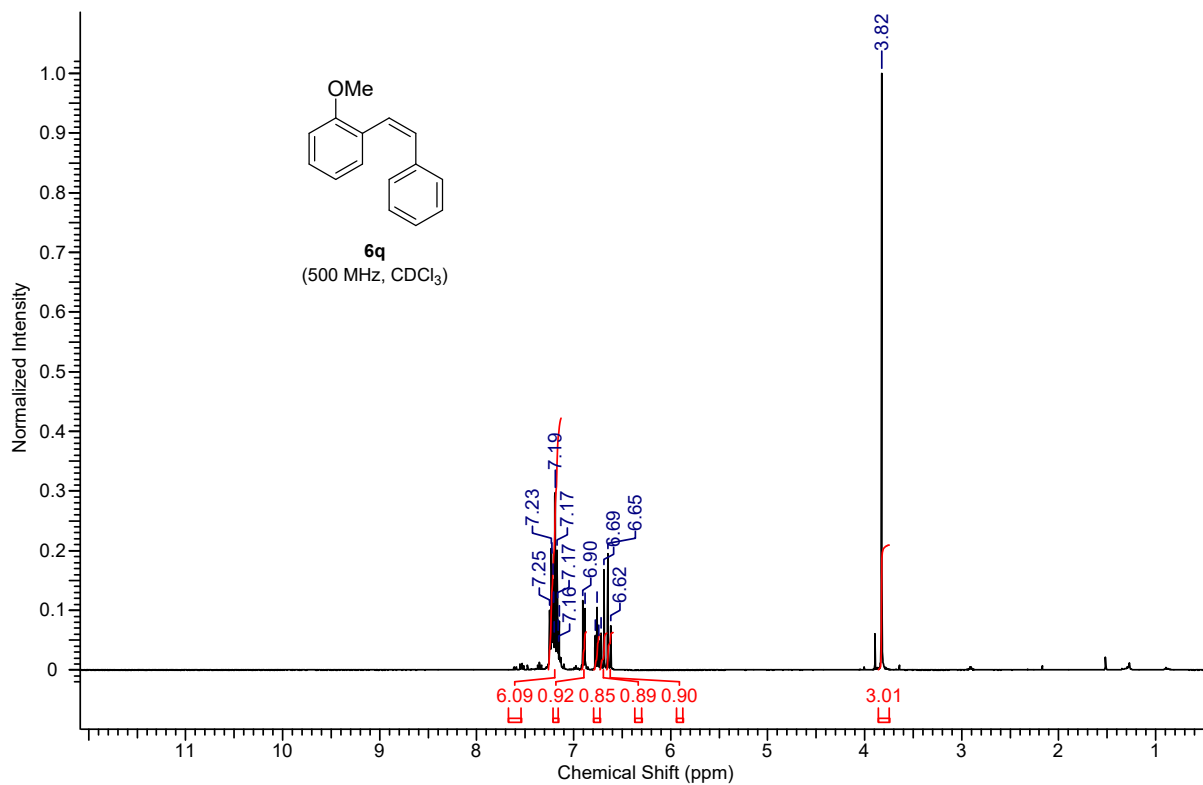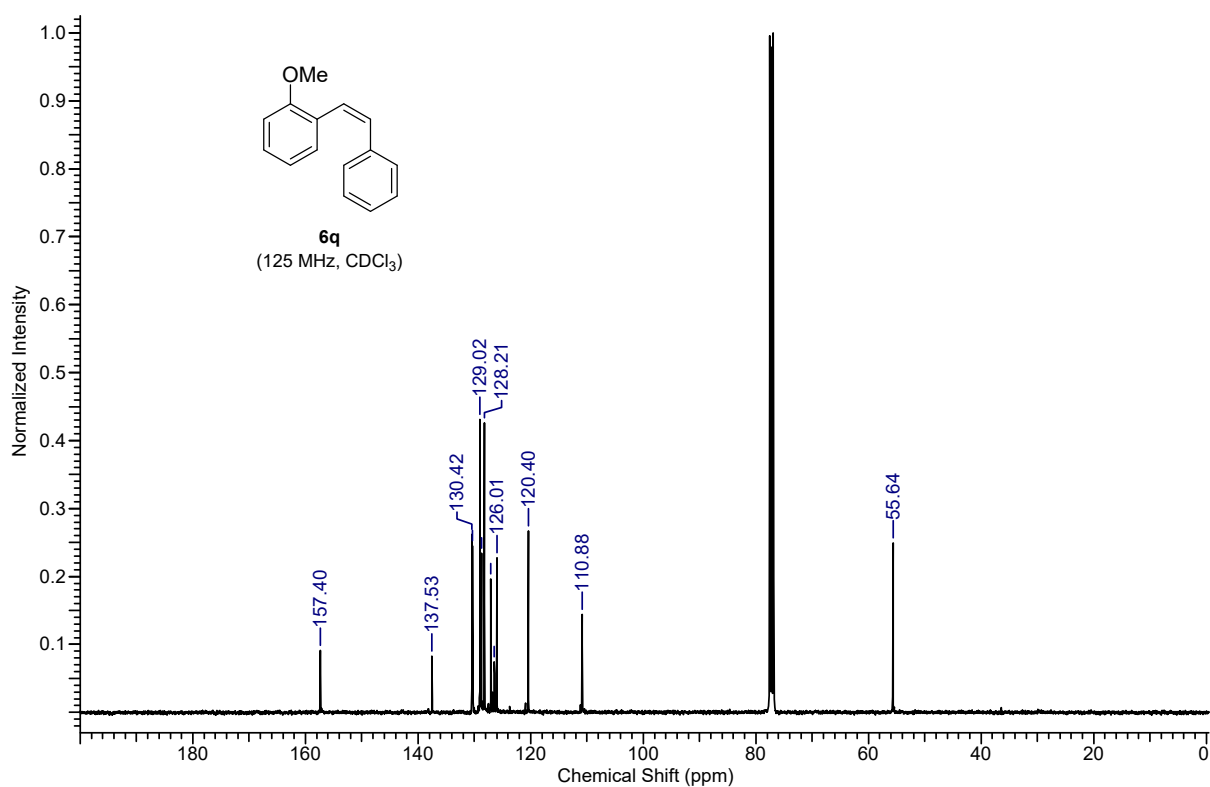

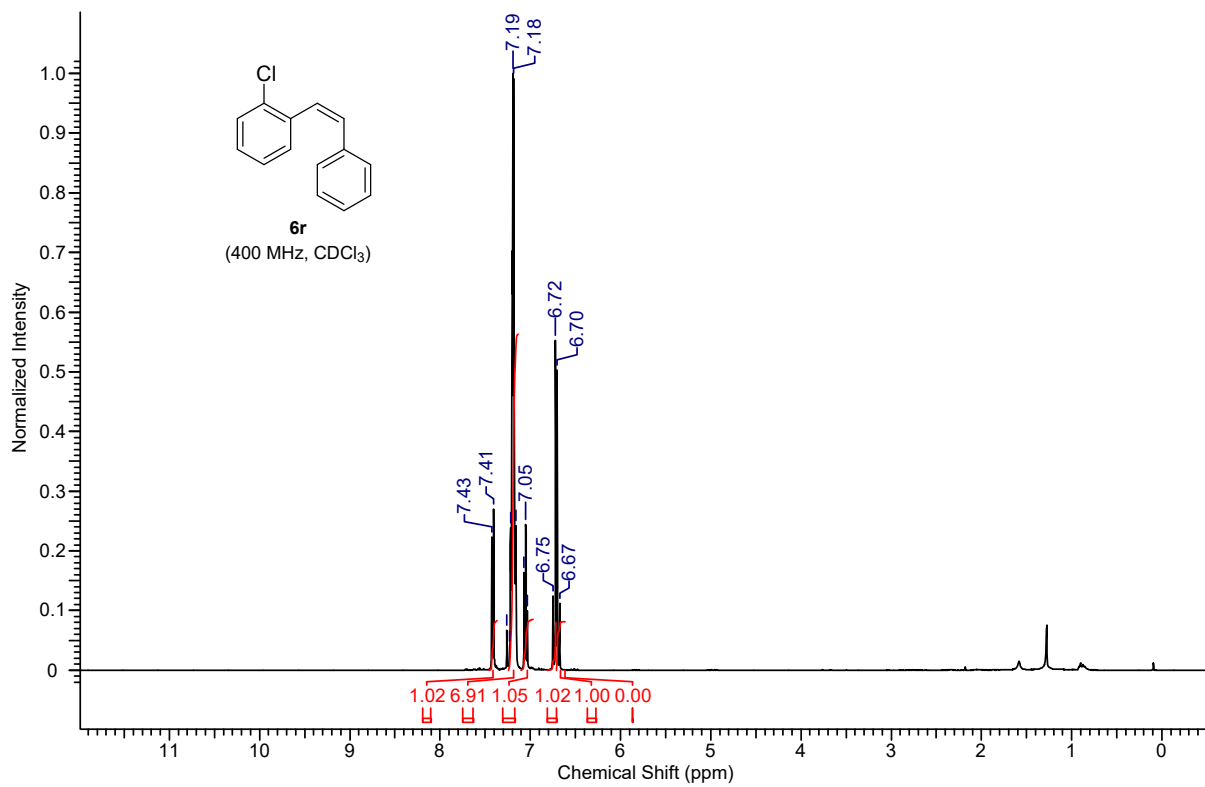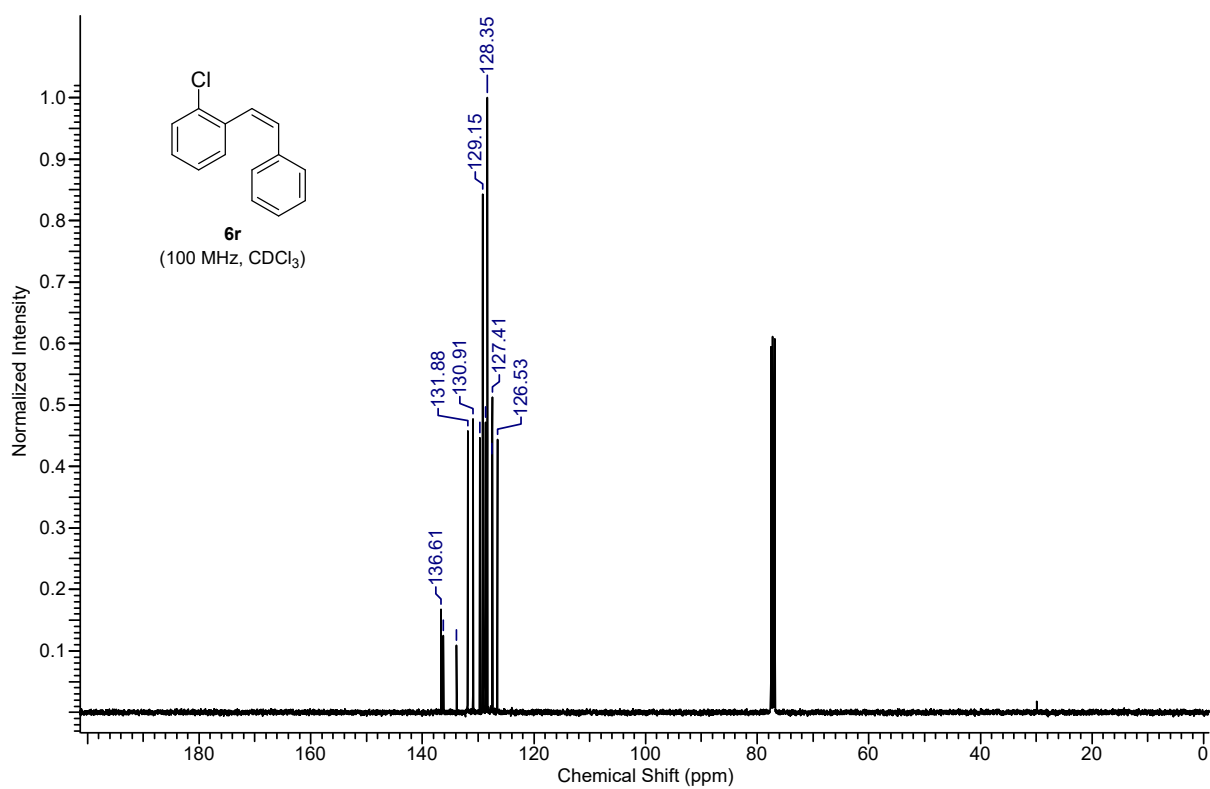

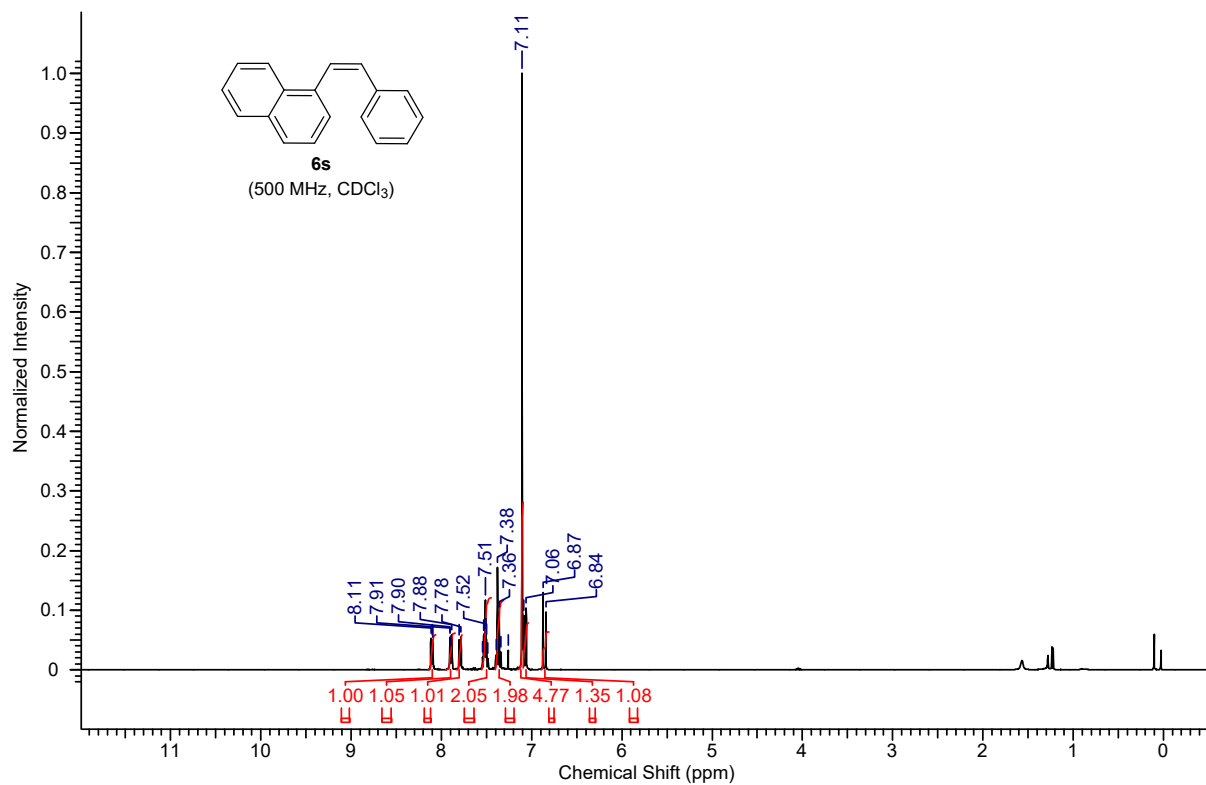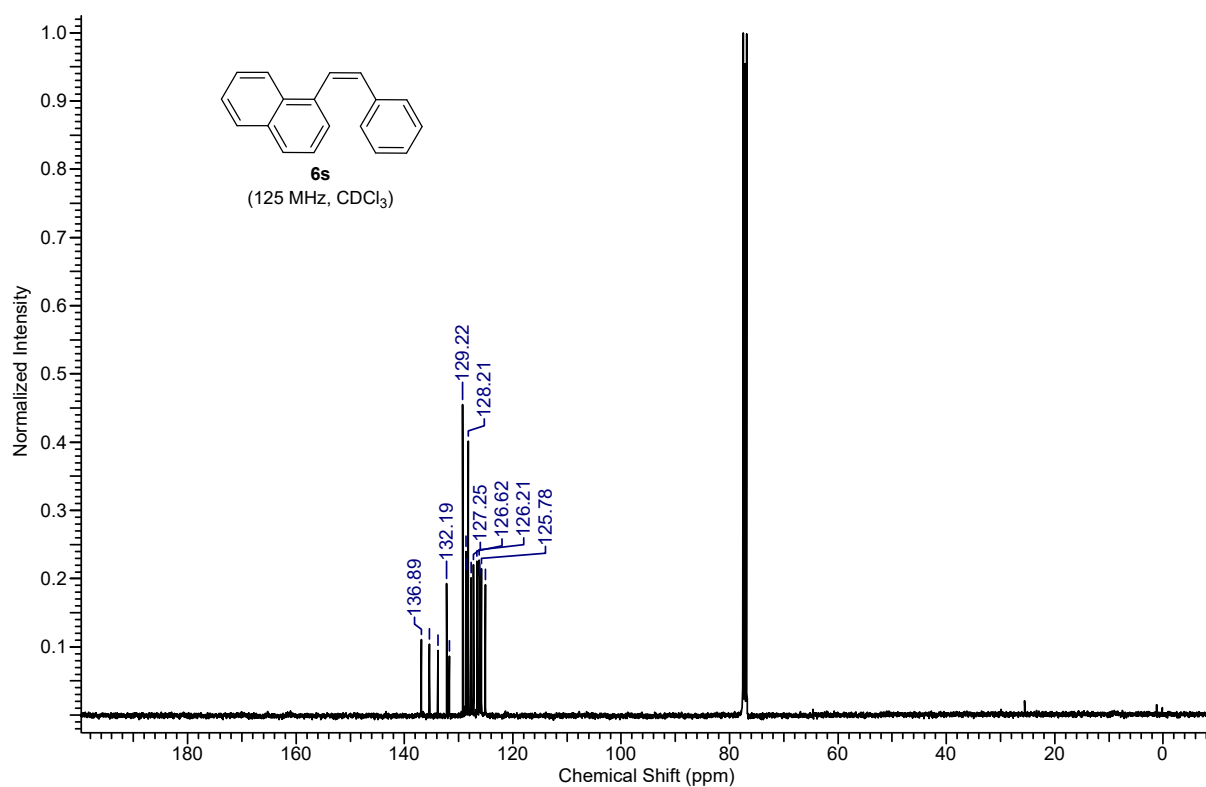

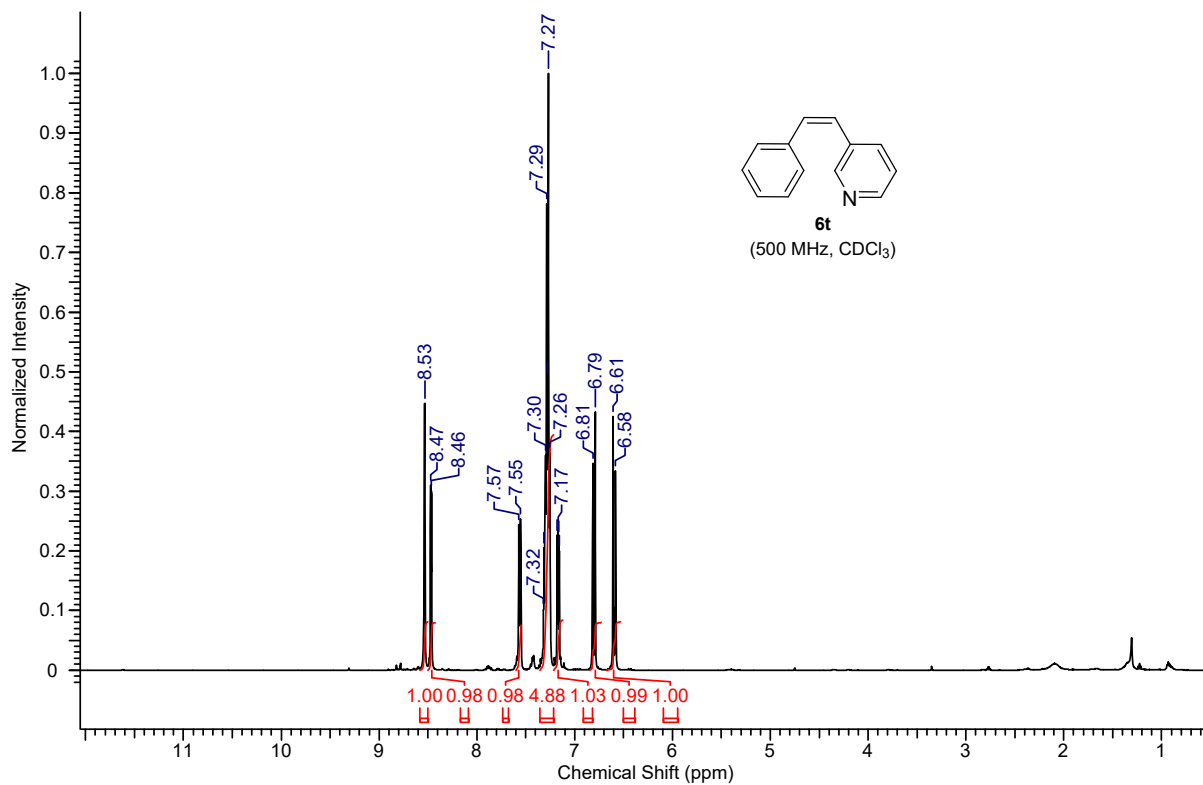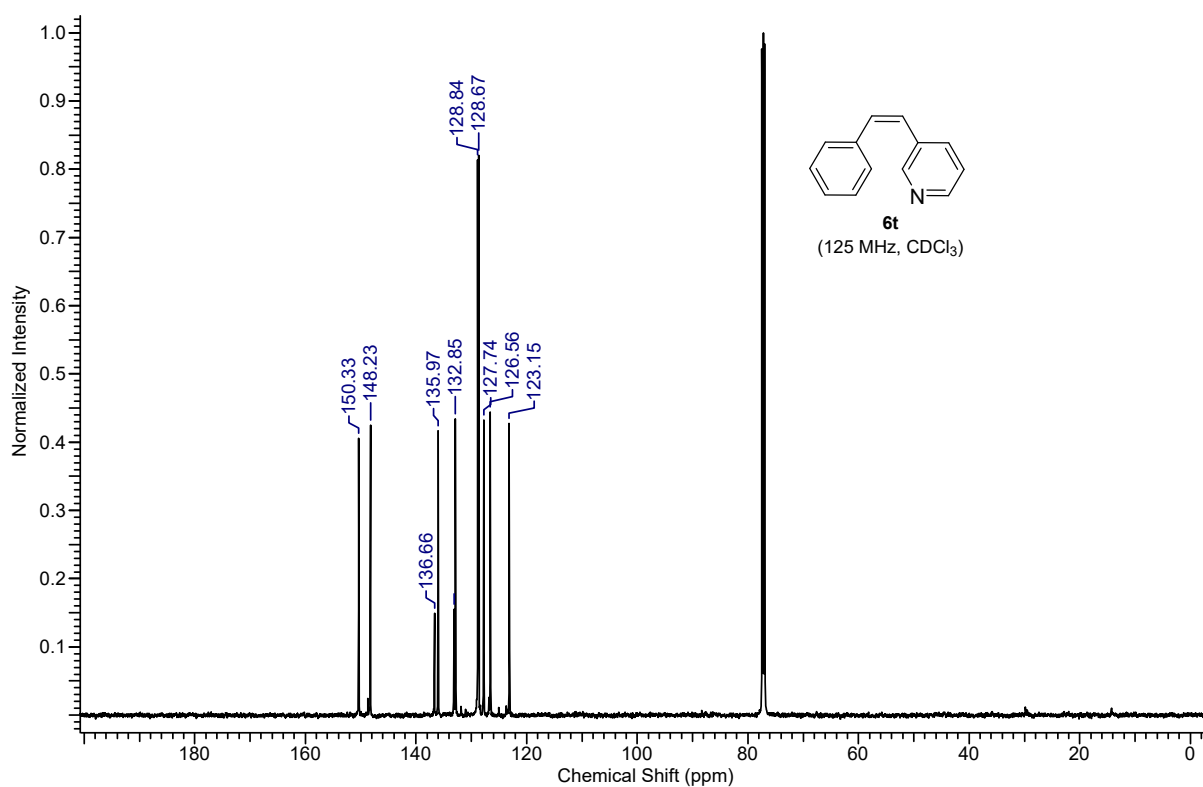

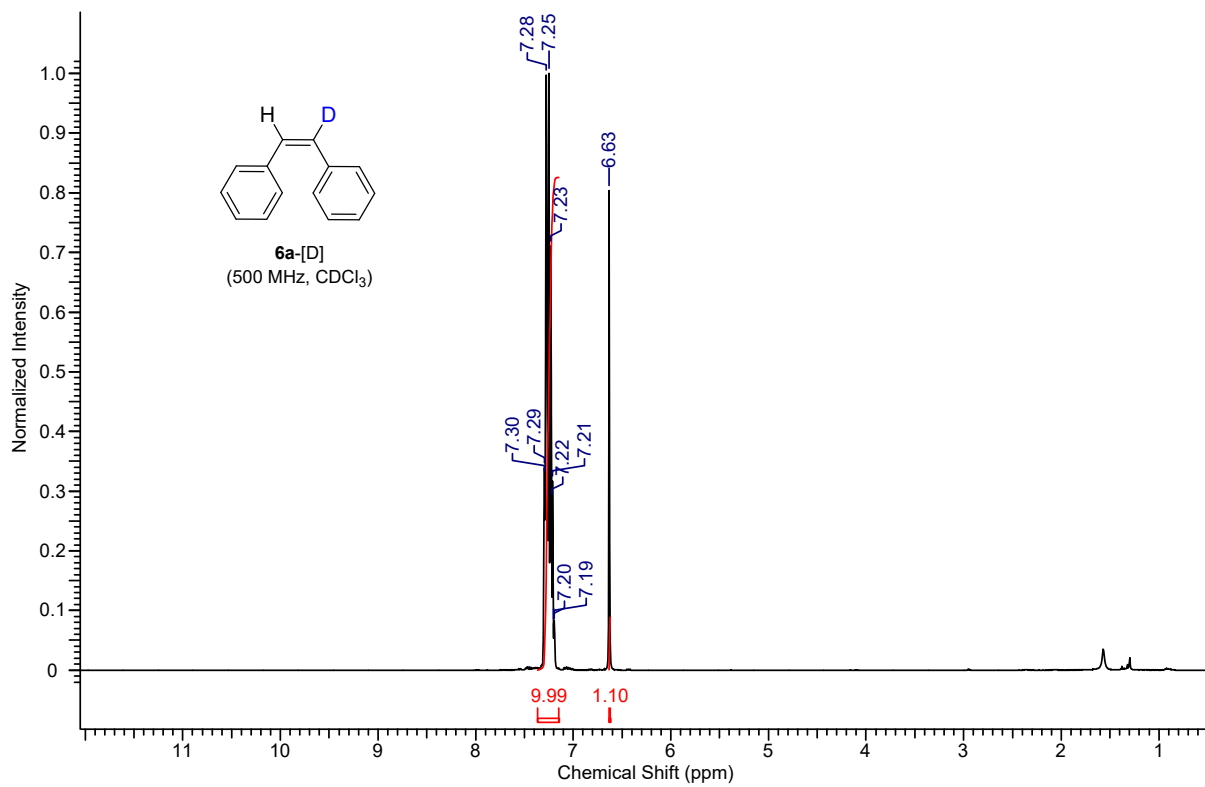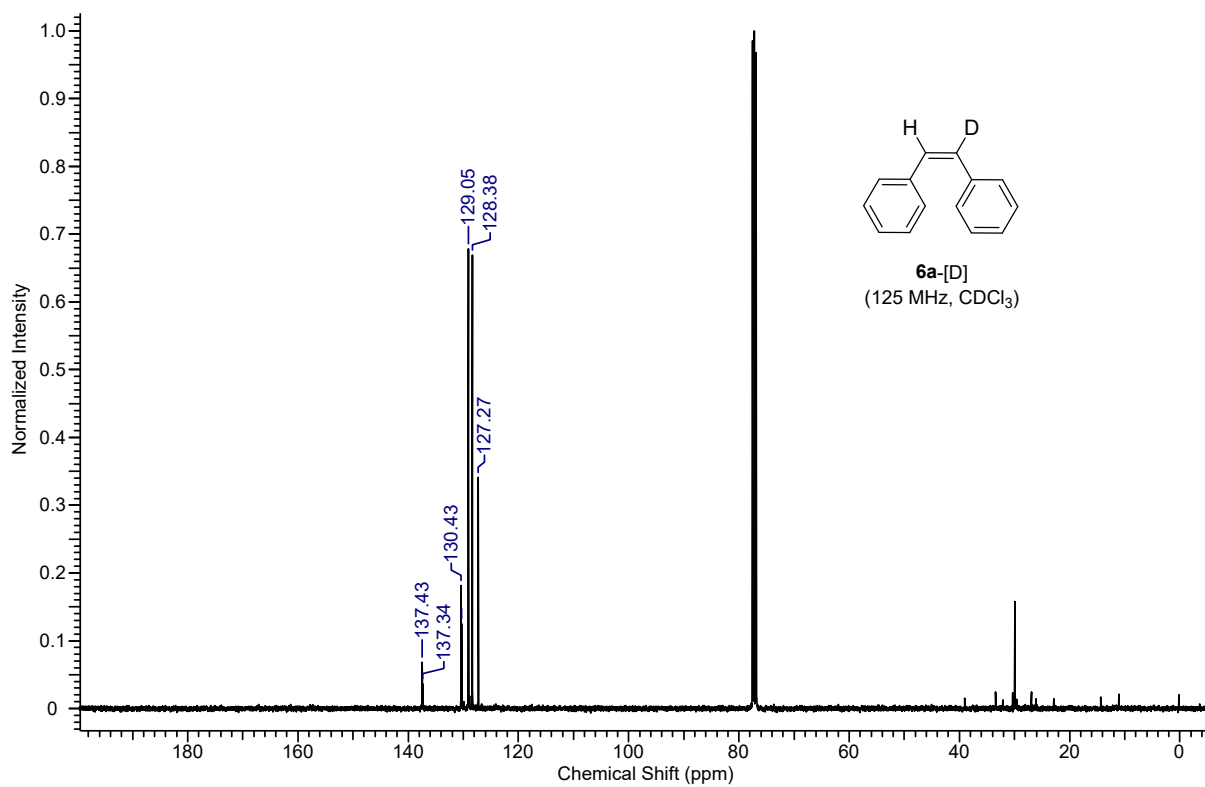

Supplement: d2cy00027j1.pdf [file d2cy00027j1.pdf]
